# Supplementary material
Source: PubMed Central journal article supplement (PMC2631184)
Supplement: NIHMS61781-supplement-si20061030_115.pdf [file NIHMS61781-supplement-si20061030_115.pdf]

# Dipolar Cycloadditions of Trimethylsilyldiazomethane Revisited: Steric Demand of the Dipolarophile and the Influence on Product Distribution.

*Dragan Simovic, Mingping Di, Vered Marks,<sup>1</sup> David C. Chatfield and Kathleen S. Rein\**

Department of Chemistry, Florida International University, Miami, FL USA 33199

[reink@fiu.edu](mailto:reink@fiu.edu)

---

<sup>1</sup> Permanent address; Department of Chemistry, Bar-Ilan University, Ramat-Gan 52900, Israel.

# Supporting Information

## Table of Contents

|                                                                             |         |
|-----------------------------------------------------------------------------|---------|
| Compound Data                                                               | S4      |
| Compound <b>5b</b> - <sup>1</sup> H-NMR, <sup>13</sup> C-NMR and HRMS data  | S4      |
| Compound <b>5c</b> - <sup>1</sup> H-NMR, <sup>13</sup> C-NMR and HRMS data  | S4      |
| Compound <b>6b</b> - <sup>1</sup> H-NMR, <sup>13</sup> C-NMR and HRMS data  | S4      |
| Compound <b>6c</b> - <sup>1</sup> H-NMR, <sup>13</sup> C-NMR and HRMS data  | S4      |
| Compound <b>7b</b> - <sup>1</sup> H-NMR, <sup>13</sup> C-NMR and HRMS data  | S5      |
| Compound <b>7c</b> - <sup>1</sup> H-NMR, <sup>13</sup> C-NMR and HRMS data  | S5      |
| Compound <b>8b</b> - <sup>1</sup> H-NMR, <sup>13</sup> C-NMR and HRMS data  | S5      |
| Compound <b>8c</b> - <sup>1</sup> H-NMR, <sup>13</sup> C-NMR and HRMS data  | S5      |
| Compound <b>9a</b> - <sup>1</sup> H-NMR, <sup>13</sup> C-NMR and HRMS data  | S6      |
| Compound <b>9b</b> - <sup>1</sup> H-NMR, <sup>13</sup> C-NMR and HRMS data  | S6      |
| Compound <b>9c</b> - <sup>1</sup> H-NMR, <sup>13</sup> C-NMR and HRMS data  | S6      |
| Compound <b>10b</b> - <sup>1</sup> H-NMR, <sup>13</sup> C-NMR and HRMS data | S6      |
| Compound <b>10c</b> - <sup>1</sup> H-NMR, <sup>13</sup> C-NMR and HRMS data | S7      |
| Compound <b>11b</b> - <sup>1</sup> H-NMR, <sup>13</sup> C-NMR and HRMS data | S7      |
| Compound <b>11c</b> - <sup>1</sup> H-NMR, <sup>13</sup> C-NMR and HRMS data | S7      |
| Compound <b>12a</b> - <sup>1</sup> H-NMR, <sup>13</sup> C-NMR and HRMS data | S8      |
| Compound <b>12b</b> - <sup>1</sup> H-NMR, <sup>13</sup> C-NMR and HRMS data | S8      |
| Compound <b>12c</b> - <sup>1</sup> H-NMR, <sup>13</sup> C-NMR and HRMS data | S8      |
| Compound <b>13a</b> - <sup>1</sup> H-NMR, <sup>13</sup> C-NMR and HRMS data | S8      |
| Compound <b>13b</b> - <sup>1</sup> H-NMR, <sup>13</sup> C-NMR and HRMS data | S9      |
| Compound <b>13c</b> - <sup>1</sup> H-NMR, <sup>13</sup> C-NMR and HRMS data | S9      |
| Compound <b>14a</b> - <sup>1</sup> H-NMR, <sup>13</sup> C-NMR and HRMS data | S9      |
| Compound <b>14c</b> - <sup>1</sup> H-NMR, <sup>13</sup> C-NMR and HRMS data | S9      |
| NMR-Spectra                                                                 |         |
| Compound <b>5b</b> - <sup>1</sup> H-NMR and <sup>13</sup> C-NMR spectrum    | S11-S12 |
| Compound <b>5c</b> - <sup>1</sup> H-NMR and <sup>13</sup> C-NMR spectrum    | S13-S14 |
| Compound <b>6b</b> - <sup>1</sup> H-NMR and <sup>13</sup> C-NMR spectrum    | S15-S16 |
| Compound <b>6c</b> - <sup>1</sup> H-NMR and <sup>13</sup> C-NMR spectrum    | S17-S18 |

|                                                                            |         |
|----------------------------------------------------------------------------|---------|
| Compound <b>7b</b> - <sup>1</sup> H-NMR and <sup>13</sup> C-NMR spectrum   | S19-S20 |
| Compound <b>7c</b> - <sup>1</sup> H-NMR and <sup>13</sup> C-NMR spectrum   | S21-S22 |
| Compound <b>8b</b> - <sup>1</sup> H-NMR and <sup>13</sup> C-NMR spectrum   | S23-S24 |
| Compound <b>8c</b> - <sup>1</sup> H-NMR and <sup>13</sup> C-NMR spectrum   | S25-S26 |
| Compound <b>9a</b> - <sup>1</sup> H-NMR and <sup>13</sup> C-NMR spectrum   | S27-S28 |
| Compound <b>9b</b> - <sup>1</sup> H-NMR and <sup>13</sup> C-NMR spectrum   | S29-S30 |
| Compound <b>9c</b> - <sup>1</sup> H-NMR and <sup>13</sup> C-NMR spectrum   | S31-S32 |
| Compound <b>10b</b> - <sup>1</sup> H-NMR and <sup>13</sup> C-NMR spectrum  | S33-S34 |
| Compound <b>10c</b> - <sup>1</sup> H-NMR and <sup>13</sup> C-NMR spectrum  | S35-S36 |
| Compound <b>11b</b> - <sup>1</sup> H-NMR and <sup>13</sup> C-NMR spectrum  | S37-S38 |
| Compound <b>11c</b> - <sup>1</sup> H-NMR and <sup>13</sup> C-NMR spectrum  | S39-S40 |
| Compound <b>12a</b> - <sup>1</sup> H-NMR and <sup>13</sup> C-NMR spectrum  | S41-S42 |
| Compound <b>12b</b> - <sup>1</sup> H-NMR and <sup>13</sup> C-NMR spectrum  | S43-S44 |
| Compound <b>12c</b> - <sup>1</sup> H-NMR and <sup>13</sup> C-NMR spectrum  | S45-S46 |
| Compound <b>13a</b> - <sup>1</sup> H-NMR and <sup>13</sup> C-NMR spectrum  | S47-S48 |
| Compound <b>13b</b> - <sup>1</sup> H-NMR and <sup>13</sup> C-NMR spectrum  | S49-S50 |
| Compound <b>13c</b> - <sup>1</sup> H-NMR and <sup>13</sup> C-NMR spectrum  | S51-S52 |
| Compound <b>14a</b> - <sup>1</sup> H-NMR and <sup>13</sup> C-NMR spectrum  | S53-S54 |
| Compound <b>14c</b> - <sup>1</sup> H-NMR and <sup>13</sup> C-NMR spectrum  | S55-S56 |
| Ethyl acrylate-TMSDM-1-pyrazoline (Entry 2) - <sup>1</sup> H-NMR           | S57-S59 |
| Ethyl crotonate-TMSDM-1-pyrazoline (Entries 5, 6) - <sup>1</sup> H-NMR     | S60-S62 |
| t-Butyl cinnamate-TMSDM-1-pyrazoline (Entries 11, 12) - <sup>1</sup> H-NMR | S63-S64 |
| Menthyl cinnamate-TMSDM-2-pyrazoline (Entry 13) - <sup>1</sup> H-NMR       | S65     |

## **Compound Data**

### **1-benzyl 5-methyl 3-(trimethylsilyl)-1H-pyrazole-1,5(4H,5H)-dicarboxylate (5b)**

Light yellow oil;  $^1\text{H}$  NMR ( $\text{CDCl}_3$ , 400MHz)  $\delta$  7.39-7.28 (m, 5H), 5.34 (d, 1H,  $J=12.4\text{Hz}$ ), 5.21 (br. s, 1H), 4.63 (dd, 1H,  $J=6.0, 12.4\text{Hz}$ ), 3.64 (br. s, 3H), 3.22 (dd, 1H,  $J=12.4, 18.1\text{Hz}$ ), 2.95 (dd, 1H,  $J=6.4, 18.1\text{Hz}$ ), 0.25 (s, 9H);  $^{13}\text{C}$  NMR ( $\text{CDCl}_3$ , 100MHz)  $\delta$  173.6 (s), 164.2 (s), 154.7 (s), 138.4(s), 130.7, 130.5, 130.4, 70.0, 59.1, 54.8, 45.7, 0.0. **HR-MS ( $\text{EI}^+$ )** calcd for  $\text{C}_{16}\text{H}_{23}\text{N}_2\text{O}_4\text{Si}$  ( $\text{MH}^+$ ): 335.1427; found 335.1422.

### **1-benzyl 5-methyl 1H-pyrazole-1,5(4H,5H)-dicarboxylate (5c)**

Yellow oil;  $^1\text{H}$  NMR ( $\text{CDCl}_3$ , 400MHz)  $\delta$  7.31-7.20 (m, 5H), 6.77 (s, 1H), 5.24 (d, 1H,  $J=12.4\text{Hz}$ ), 5.13 (d, 1H,  $J=11.6\text{Hz}$ ), 4.66 (dd, 1H,  $J=5.8, 12.4\text{Hz}$ ), 3.61 (s, 3H), 3.17 (dd, 1H,  $J=12.4, 18.4\text{Hz}$ ), 2.89 (dd, 1H,  $J=6.0, 18.4\text{Hz}$ )  $^{13}\text{C}$  NMR ( $\text{CDCl}_3$ , 100M Hz)  $\delta$  169.2 (s), 151.2 (s), 143.2, 134.5 (s), 127.2, 126.97, 126.95, 66.7, 55.6, 51.3, 37.8. **HR-MS ( $\text{EI}^+$ )** calcd for  $\text{C}_{13}\text{H}_{15}\text{O}_4\text{N}_2$  ( $\text{MH}^+$ ): 263.1032, found 263.1027.

### **1-benzyl 5-ethyl 3-(trimethylsilyl)-1H-pyrazole-1,5(4H,5H)-dicarboxylate (6b)**

Yellow oil;  $^1\text{H}$  NMR ( $\text{CDCl}_3$ , 400MHz)  $\delta$  7.50-7.25 (m, 5H), 5.30-5.15 (m, 2H), 4.61 (dd, 1H,  $J=6.0, 12.4\text{Hz}$ ), 4.10 (bs, 2H), 3.20 (dd 1H,  $J=18\text{Hz}, 12.3\text{Hz}$ ), 2.95 (dd, 1H,  $J=18.1\text{Hz}, 6.1\text{Hz}$ ), 1.22 (bs, 3H), 0.25 (s, 9H);  $^{13}\text{C}$  NMR ( $\text{CDCl}_3$ , 100MHz)  $\delta$  171.1 (s), 162.2 (s), 152.7(s), 136.5(s), 128.8, 128.5, 68.0, 61.9, 57.3, 43.8, 14.4, -1.9; **HR-MS ( $\text{EI}^+$ )**: calcd for  $\text{C}_{17}\text{H}_{24}\text{O}_4\text{N}_2\text{Si}$  ( $\text{M}^+$ ): 348.1505, found: 348.1496

### **1-benzyl 5-ethyl 1H-pyrazole-1,5(4H,5H)-dicarboxylate (6c)**

Yellow oil; 90% yield.  $^1\text{H}$  NMR ( $\text{CDCl}_3$ , 400 MHz)  $\delta$  7.50-7.25 (m, 5H), 6.85 (s, 1H), 5.35-5.15 (m, 2H), 4.70 (dd, 1H,  $J=12.6, 5.9\text{ Hz}$ ), 4.35-3.59 (bs, 2H), 3.25 (dd, 1H,  $J=18.4, 12.6\text{ Hz}$ ), 2.95 (dd 1H,  $J=18.5, 5.2\text{ Hz}$ ), 1.40-1.10 (bs, 3H);  $^{13}\text{C}$  NMR ( $\text{CDCl}_3$ , 100MHz)  $\delta$  170.5 (s), 152.8 (s), 145.5, 136.2(s), 128.8, 128.6, 128.5, 71.0, 68.1, 62.1, 57.3, 39.4, 14.3; **HR-MS ( $\text{EI}^+$ )**: calcd for  $\text{C}_{14}\text{H}_{16}\text{O}_4\text{N}_2$  ( $\text{M}^+$ ): 276.111007, found: 276.111427

**1-benzyl 5-tert-butyl 3-(trimethylsilyl)-1H-pyrazole-1,5(4H,5H)-dicarboxylate (7b)** Yellow oil;  $^1\text{H}$  NMR ( $\text{CDCl}_3$ , 400 MHz),  $\delta$  7.20-7.00 (m, 5H), 5.00 (bs, 2H), 4.25 (dd, 1H,  $J=12.2, 5.8\text{ Hz}$ ), 2.95 (dd, 1H,

J=17.9, 12.3 Hz), 2.65 (dd, 1H, J=17.9, 5.8 Hz), 1.15 (s, 9H), 0.03 (s, 9H);  $^{13}\text{C}$  NMR ( $\text{CDCl}_3$ , 100 MHz)  $\delta$  172.1, 164.1, 154.7, 138.5, 131.0, 130.9, 130.8, 130.7, 130.68, 84.3, 69.8, 59.9, 45.9, 30.1, 0.0; **HR-MS** ( $\text{EI}^+$ ): calcd for  $\text{C}_{19}\text{H}_{28}\text{O}_4\text{N}_2\text{Si}$  ( $\text{M}^+$ ): 376.1818, found: 376.1831

**1-benzyl 5-tert-butyl 1H-pyrazole-1,5(4H,5H)-dicarboxylate (7c)**

Yellow oil;  $^1\text{H}$  NMR ( $\text{CDCl}_3$ , 400MHz)  $\delta$  7.38-7.24 (m, 5H), 6.80 (s, 1H), 5.25 (d, 1H, J= 12.8Hz), 5.21 (d, 1H, J= 12.3Hz), 4.57 ( dd, 1H, J=5.6, 12.5Hz), 3.19 ( dd, 1H, J=12.6, 18.4Hz), 2.88 ( dd, 1H, J=5.6, 18.6Hz), 1.37 (s, 9H);  $^{13}\text{C}$  NMR ( $\text{CDCl}_3$ , 100MHz)  $\delta$  169.5 (s), 152.9 (s), 144.9 (d), 136.3 (s), 128.8 (d), 128.7 (d), 128.6 (d), 82.8 (s), 68.1 (t), 58.0 (d), 39.5 (t), 28.1 (q). **HR-MS** ( $\text{EI}^+$ ): calcd for  $\text{C}_{16}\text{H}_{21}\text{N}_2\text{O}_4$  ( $\text{MH}^+$ ): 305.1501; found 305.1492

**1-benzyl 5-(2-isopropyl-5-methylcyclohexyl) 3-(trimethylsilyl)-1H-pyrazole-1,5(4H,5H)-dicarboxylate (8b)** Yellow oil;  $^1\text{H}$  NMR Both diastereoisomers: ( $\text{CDCl}_3$ , 400MHz),  $\delta$  7.20-7.00 (m, 5H), 5.10-4.90 (m, 2H), 4.50-4.30 (m, 2H), 3.05-2.90 (m, 1H), 2.75-2.60 (m, 1H), 1.75-1.45 (m, 2H), 1.40 (m, 2H), 1.30-1.00 (m, 2H), 0.85-0.50 (m, 9H), 0.45 (m, 3H), 0.00 (s, 9H);  $^{13}\text{C}$  NMR ( $\text{CDCl}_3$ , 100MHz) Major diastereoisomer:  $\delta$  172.6, 164.1, 154.7, 138.4, 130.9, 130.8, 130.6, 130.4, 130.3, 77.9, 69.9, 59.5, 49.1, 48.9, 46.8, 42.5, 36.4, 33.7, 28.4, 25.6, 24.3, 23.1, 18.6, 0.3; Minor isomer: 164.0, 130.8, 77.9, 69.8, 59.6, 49.1, 42.8, 36.4, 33.6, 28.4, 25.7, 23.0, 18.5; **HR-MS** ( $\text{EI}^+$ ): calcd for  $\text{C}_{25}\text{H}_{38}\text{O}_4\text{N}_2\text{Si}$  ( $\text{MH}^+$ ): 459.2679, found: 459.2687

**1-benzyl 5-(2-isopropyl-5-methylcyclohexyl) 1H-pyrazole-1,5(4H,5H)-dicarboxylate (8c)**

Yellow oil;  $^1\text{H}$  NMR ( $\text{CDCl}_3$ , 400 MHz),  $\delta$  7.45-7.25 (m, 5H), 6.83 (s, 1H), 5.35-5.10 (m, 2H), 4.73-4.65 (m, 2H), 3.30-3.15 (m, 1H), 2.85 (d, 1H Major isomer J=5.7 Hz, d, 1H, Minor isomer J=5.6 Hz), 2.00-1.75 (m, 2H), 1.70-1.60 (d, 2H, J=13.2 Hz), 1.50-1.30 (m, 2H), 1.00 (q, 1H, J=11.0 Hz), 0.95-0.80 (m, 9H), 0.75-0.65 (m, 3H);  $^{13}\text{C}$  NMR ( $\text{CDCl}_3$ , 100 MHz) Major diastereoisomer:  $\delta$  169.6, 152.4, 144.6, 135.9, 128.5, 128.2, 128.1, 127.2, 75.8, 67.8, 57.2, 46.7, 40.4, 39.2, 34.0, 31.3, 26.2, 23.3, 20.8, 18.8 ; Minor diastereoisomer: 169.5, 144.6, 135.7, 128.3, 128.2, 126.8, 75.8, 67.7, 57.1, 46.7, 40.2, 31.2, 26.0, 23.1; **HR-MS** ( $\text{EI}^+$ ): calcd for  $\text{C}_{22}\text{H}_{30}\text{O}_4\text{N}_2$  ( $\text{MH}^+$ ): 387.2284, found: 387.2294

**1-benzyl 3-ethyl 4-methyl-5-(trimethylsilyl)-1H-pyrazole-1,3(4H,5H)-dicarboxylate (9a)**

Yellow oil;  $^1\text{H NMR}$  ( $\text{CDCl}_3$ , 400 MHz)  $\delta$  7.35 (m, 2H), 7.30-7.20 (m, 3H), 5.25 (d, 1H,  $J=12.2$  Hz), 5.18 (d, 1H,  $J=12.2$  Hz), 4.25 (q, 2H,  $J=7.1$  Hz), 3.40 (d, 1H,  $J=7.7$  Hz), 3.25 (m, 1H), 1.30 (t, 3H,  $J=7.1$  Hz), 1.22 (d, 3H,  $J=6.9$ Hz), 0.06 (s, 9H);  $^{13}\text{C NMR}$  ( $\text{CDCl}_3$ , 100MHz)  $\delta$  161.8 (s), 152.9 (s), 151.0 (s), 135.8 (s), 128.6 (d), 128.5 (d), 128.3 (d), 68.1 (t), 61.7 (t), 58.9 (d), 42.6 (d), 20.1 (q), 14.18 (q), -2.99 (q). **HRMS** ( $\text{EI}^+$ ) calcd for  $\text{C}_{18}\text{H}_{27}\text{N}_2\text{O}_4\text{Si}$  ( $\text{MH}^+$ ) 363.1740; found 363.1748; Elemental analysis: calculated: C 59.64 %, H 7.23 %, N 7.73 %; found: C 59.69 %, H 7.26 %, N 7.74 %;

**1-benzyl 5-ethyl 4-methyl-3-(trimethylsilyl)-1H-pyrazole-1,5(4H,5H)-dicarboxylate (9b)**

Yellow oil;  $^1\text{H NMR}$  ( $\text{CDCl}_3$ , 400 MHz),  $\delta$  7.20-6.95 (m, 5H), 5.05-4.90 (m, 2H), 3.93 (d, 1H,  $J=5.3$  Hz), 3.84 (bs, 2H), 3.05-2.95 (quintet, 1H  $J=6.0$  Hz), 1.00 (d, 3H,  $J=7.3$  Hz), 0.90 (bs, 3H), 0.00 (s, 9H);  $^{13}\text{C NMR}$  ( $\text{CDCl}_3$ , 100 MHz)  $\delta$  171.9 (s), 167.3 (s), 154.0 (s), 137.6 (s), 129.9, 129.8, 129.6, 69.1, 66.5, 63.0, 53.8, 20.0, 15.6, 0.0; **HR-MS** ( $\text{EI}^+$ ) calcd for  $\text{C}_{18}\text{H}_{27}\text{N}_2\text{O}_4\text{Si}$  ( $\text{M}^+$ ): 362.1662, found: 362.1656

**1-benzyl 5-ethyl 4-methyl-1H-pyrazole-1,5(4H,5H)-dicarboxylate (9c)**

Yellow oil;  $^1\text{H NMR}$  ( $\text{CDCl}_3$ , 400 MHz) ( $\text{CDCl}_3$ , 400MHz),  $\delta$  7.30-7.26 (m, 5H), 6.75 (s, 1H), 5.30-5.10 (m, 2H), 4.28 (d, 1H,  $J=5.6$  Hz), 4.12 (bs, 2H), 3.30-3.15 (m, 1H), 1.25 (d, 3H,  $J=7.3$  Hz), 1.10 (bs, 3H);  $^{13}\text{C NMR}$  ( $\text{CDCl}_3$ , 100 MHz)  $\delta$  169.9, 152.6, 149.5, 135.9, 128.4, 128.2, 128.2, 68.0, 64.8, 61.7, 47.3, 17.5, 14.1; **HR-MS** ( $\text{EI}^+$ ) calcd for  $\text{C}_{15}\text{H}_{18}\text{N}_2\text{O}_4$  ( $\text{M}^+$ ): 290.1267, found: 290.1268; Elemental analysis: calculated: C 62.06 %, H 6.25 %, N 9.65 %; found: C 61.75 %, H 6.23 %, N 9.58 %;

**1-benzyl 5-tert-butyl 4-methyl-3-(trimethylsilyl)-1H-pyrazole-1,5(4H,5H)-dicarboxylate (10b)**

Yellow oil;  $^1\text{H NMR}$  ( $\text{CDCl}_3$ , 400MHz),  $\delta$  7.20-6.98 (m, 5H), 5.00 (s, 2H), 3.81 (d, 1H,  $J=4.9$  Hz), 2.95 (dq, 1H,  $J=7.2$ Hz, 5.1 Hz), 1.15 (s, 9H), 0.98 (d, 3H,  $J=7.3$  Hz), 0.00 (s, 9H);  $^{13}\text{C NMR}$  ( $\text{CDCl}_3$ , 100MHz)  $\delta$  170.9, 167.2, 154.2, 137.7, 130.3, 130.1, 130.0, 129.7, 129.6, 83.4, 69.0, 67.4, 53.7, 29.4, 20.0, 0.0; **HR-MS**: ( $\text{EI}^+$ ) calcd for  $\text{C}_{20}\text{H}_{30}\text{O}_4\text{N}_2\text{Si}$  ( $\text{M}^+$ ): 390.1975, found: 390.1977

**1-benzyl 5-tert-butyl 4-methyl-1H-pyrazole-1,5(4H,5H)-dicarboxylate (10c)**

Yellow oil;  $^1\text{H NMR}$  ( $\text{CDCl}_3$ , 400MHz),  $\delta$  7.40-7.20 (m, 5H), 6.70 (s, 1H), 5.25 (s, 1H,  $J=12.2\text{Hz}$ ), 5.21 (s, 1H,  $J=12.2\text{Hz}$ ), 4.13 (d, 1H,  $J=5.5\text{Hz}$ ), 3.15 (d,quint, 1H,  $J=7.1\text{ Hz}$ , 1 Hz), 1.35 (s, 9H), 1.20 (d, 3H,  $J=7.3\text{Hz}$ );  $^{13}\text{C NMR}$  ( $\text{CDCl}_3$ , 100MHz)  $\delta$  168.8, 152.7, 148.9, 135.9, 128.9, 128.5, 128.3, 128.2, 128.0, 82.4, 67.8, 65.4, 47.3, 27.8, 17.6; **HR-MS ( $\text{EI}^+$ )** calcd for  $\text{C}_{17}\text{H}_{22}\text{O}_4\text{N}_2$  ( $\text{M}^+$ ): 319.1658, found: 319.1667

**1-benzyl 5-(2-isopropyl-5-methylcyclohexyl) 4-methyl-3-(trimethylsilyl)-1H-pyrazole-1,5(4H,5H)-dicarboxylate (11b)** Yellow oil;  $^1\text{H NMR}$  ( $\text{CDCl}_3$ , 400MHz),  $\delta$  7.45-7.25 (m, 5H), 5.40-5.10 (m, 2H), 4.70-4.60 (m, 1H), 4.20 (d, 1H major isomer  $J=4.3\text{ Hz}$ , minor isomer  $J=4.9\text{ Hz}$ ), 3.20 (m, 1H), 2.00-1.75 (m, 1H), 1.75-1.55 (m, 3H), 1.50-1.30 (m, 2H), 1.25 (d, 3H,  $J=9.1\text{ Hz}$ ), 1.10-0.95 (m, 1H), 0.95-0.75 (m, 9H), 0.70 (m, 3H), 0.25 (s, 9H);  $^{13}\text{C NMR}$  ( $\text{CDCl}_3$ , 100MHz) Major diastereoisomer:  $\delta$  171.6, 167.4, 154.2, 137.5, 130.2, 130.1, 130.0, 129.9, 77.1, 69.0, 66.7, 48.1, 42.0, 35.7, 32.9, 27.7, 24.8, 23.6, 22.2, 20.3, 17.7, 0.0; Minor diastereoisomer: 171.5, 130.1, 130.0, 130.0, 129.9, 129.8, 77.0, 69.2, 66.8, 48.3, 42.0, 35.6, 32.8, 27.6, 24.6, 22.4, 19.9, 17.5, 0.2; **HR-MS ( $\text{EI}^+$ )** calcd for  $\text{C}_{26}\text{H}_{40}\text{O}_4\text{N}_2\text{Si}$  ( $\text{MH}^+$ ): 473.2836, found: 473.2823

**1-benzyl 5-(2-isopropyl-5-methylcyclohexyl) 4-methyl-1H-pyrazole-1,5(4H,5H)-dicarboxylate (11c)** Yellow oil;  $^1\text{H NMR}$  ( $\text{CDCl}_3$ , 400MHz),  $\delta$  7.40-7.20 (m, 5H), 6.70 (s, 1H), 5.30-5.00 (m, 2H), 4.70-4.55 (m, 1H), 4.2 (d, 1H major isomer  $J=5.2\text{ Hz}$ , minor isomer 5.7 Hz), 3.2-3.05 (m, 1H), 1.90-1.65 (m, 2H) 1.65-1.55 (m, 2H), 1.45-1.25 (m, 2H), 1.23 (d, 3H, major diastereoisomer  $J=7.3\text{Hz}$ , minor diastereoisomer  $J=7.3\text{ Hz}$ ), 1.00-0.85 (m, 1H), 0.85-0.70 (m, 9H), 0.60 (m, 3H);  $^{13}\text{C NMR}$  ( $\text{CDCl}_3$ , 100 MHz) Major diastereoisomer:  $\delta$  169.4, 152.5, 135.8, 128.4, 128.2, 128.1, 127.1, 103.9, 77.7, 77.1, 75.6, 67.8, 65.7, 47.5, 40.5, 34.0, 34.0, 31.2, 26.28, 23.4, 22.6, 20.8, 18.2, Minor diastereoisomer: 169.3, 149.0, 135.7, 128.1, 126.7, 103.5, 77.4, 75.9, 67.7, 23.1; **HR-MS ( $\text{EI}^+$ )** calcd for:  $\text{C}_{23}\text{H}_{32}\text{O}_4\text{N}_2$  ( $\text{MH}^+$ ): 401.2440, found: 401.2445

**1-benzyl 3-ethyl 4-phenyl-5-(trimethylsilyl)-1H-pyrazole-1,3(4H,5H)-dicarboxylate (12a)**

White crystalline solid, mp: 76-78  $^\circ\text{C}$ ,  $^1\text{H NMR}$  ( $\text{CDCl}_3$ , 600MHz)  $\delta$  7.35 (d, 2H,  $J=1.6\text{Hz}$ ), 7.39-7.10 (m, 6H), 7.00 (d, 1H,  $J=6.9\text{ Hz}$ ), 5.25 (d, 1H,  $J=12.2\text{ Hz}$ ), 5.15 (d, 1H,  $J=12.2\text{ Hz}$ ) 4.25 (d, 1H,  $J=6.8\text{ Hz}$ ), 4.1

(m, 2H), 3.83 (d, 1H, J=6.7 Hz), 1.1 (t, 3H, J=7.1 Hz), 0.00 (s, 9H);  $^{13}\text{C}$  NMR ( $\text{CDCl}_3$ , 100MHz)  $\delta$  161.3, 152.6, 149.0, 141.2, 135.8, 129.1, 128.5, 128.4, 127.7, 127.1, 68.3, 61.7, 61.1, 53.1, 14.0, -2.9; **HR-MS** ( $\text{EI}^+$ ) calcd for  $\text{C}_{23}\text{H}_{28}\text{O}_4\text{N}_2\text{Si}$  ( $\text{MH}^+$ ): 425.1897, found: 425.1884

**1-benzyl 5-ethyl 4-phenyl-3-(trimethylsilyl)-1H-pyrazole-1,5(4H,5H)-dicarboxylate (12b)**

Yellow oil;  $^1\text{H}$  NMR ( $\text{CDCl}_3$ , 400MHz)  $\delta$  7.43-7.25 (m, 8H), 7.10 (d, 2H 7.6 Hz), 5.35-5.10 (m, 2H), 4.5 (d, 1H, J= 4.8 Hz), 4.20 (d, 1H, J= 5.0 Hz), 4.1 (bs, 2H), 1.17 (bs, 3H), 0.00 (s, 9H);  $^{13}\text{C}$  NMR ( $\text{CDCl}_3$ , 100MHz)  $\delta$  171.8, 165.4, 154.0, 140.1, 137.7, 131.0, 130.8, 130.8, 130.2, 130.0, 129.9, 129.8, 129.4, 69.5, 68.0, 64.7, 63.4, 15.8, 0.0.

**1-benzyl 5-ethyl 4-phenyl-1H-pyrazole-1,5(4H,5H)-dicarboxylate (12c)**

Yellow oil;  $^1\text{H}$  NMR ( $\text{CDCl}_3$ , 400MHz)  $\delta$  7.45-7.25 (m 8H), 7.10 (d, 2H, J= 5.6 Hz), 6.90 (s, 1H), 5.30-5.10 (m, 2H), 4.65 (d, 1H, J=5.4 Hz), 4.33 (d, 1H, J=5.5), 4.19 (bs, 2H), 1.27 (bs, 3H);  $^{13}\text{C}$  NMR ( $\text{CDCl}_3$ , 100MHz)  $\delta$  169.5 (s), 152.4 (s), 146.5, 137.1 (s), 135.7 (s), 129.4, 128.6, 128.5, 128.5, 128.3, 128.3, 128.0, 127.3, 68.1, 66.0, 62.0, 57.7, 14.1; **HR-MS** ( $\text{EI}^+$ ) calcd for:  $\text{C}_{20}\text{H}_{20}\text{O}_4\text{N}_2$  ( $\text{MH}^+$ ): 352.1423, found: 352.1430

**1-benzyl 3-tert-butyl 4-phenyl-5-(trimethylsilyl)-1H-pyrazole-1,3(4H,5H)-dicarboxylate (13a)**

White crystalline solid, mp: 88-90 °C,  $^1\text{H}$  NMR ( $\text{CDCl}_3$ , 400MHz),  $\delta$  7.33 (d, 2H, J=5.7 Hz), 7.30-7.10 (m, 6H), 7.00 (d, 2H, J=7.0 Hz), 5.23 (d, 1H, J=12.3 Hz), 5.15 (d, 1H, J=12.7 Hz), 4.15 (d, 1H, J=7.4 Hz), 3.80 (d, 1H, J=7.4 Hz), 1.20 (s, 9H), 0.20 (s, 9H);  $^{13}\text{C}$  NMR ( $\text{CDCl}_3$ , 100MHz)  $\delta$  160.1, 152.8, 150.3, 141.5, 135.8, 129.0, 128.5, 128.3, 127.5, 127.3, 82.8, 68.8, 60.9, 53.5, 27.8, -2.8; **HR-MS** ( $\text{EI}^+$ ) calcd for:  $\text{C}_{25}\text{H}_{32}\text{O}_4\text{N}_2\text{Si}$  ( $\text{MH}^+$ ): 453.2210, found: 453.2206

**1-benzyl 5-tert-butyl 4-phenyl-3-(trimethylsilyl)-1H-pyrazole-1,5(4H,5H)-dicarboxylate (13b)**

Yellow oil;  $^1\text{H}$  NMR ( $\text{CDCl}_3$ , 400MHz),  $\delta$  7.40-7.20 (m, 8H), 7.05 (d, 2H, J= 6.4 Hz), 5.30-5.15 (m, 2H), 4.40 (d, 1H, J=4.7 Hz), 4.15 (d, 1H, J=4.7 Hz), 1.35 (s, 9H), 0.00 (s, 9H);  $^{13}\text{C}$  NMR ( $\text{CDCl}_3$ , 100MHz)  $\delta$  170.8, 165.3, 154.2, 140.3, 137.7, 130.9, 130.2, 129.9, 129.9, 129.4, 84.0, 69.4, 68.7, 64.9, 29.6, 0.0; **HR-MS** ( $\text{EI}^+$ ) calcd for:  $\text{C}_{25}\text{H}_{32}\text{O}_4\text{N}_2\text{Si}$  ( $\text{MH}^+$ ): 453.2210, found: 453.2223



**1-benzyl 5-tert-butyl 4-phenyl-1H-pyrazole-1,5(4H,5H)-dicarboxylate (13c)**

White crystalline solid, mp: 97-100 °C,  $^1\text{H NMR}$  ( $\text{CDCl}_3$ , 400 MHz),  $\delta$  7.48-7.28 (m, 8H), 7.15 (m, 2H), 6.92 (s, 1H), 5.35-5.25 (m, 2H), 4.55 (d, 1H,  $J=5.4\text{Hz}$ ), 4.30 (dd, 1H,  $J=5.4, 1.3\text{ Hz}$ ), 1.48 (s, 9H),  $^{13}\text{C NMR}$  ( $\text{CDCl}_3$ , 100MHz)  $\delta$  168.5, 152.5, 146.2, 137.4, 135.7, 129.4, 128.5, 128.4, 128.3, 127.3, 82.7, 68.0, 66.6, 57.9, 28.0; **HR-MS** ( $\text{EI}^+$ ) calcd for:  $\text{C}_{22}\text{H}_{24}\text{O}_4\text{N}_2$  ( $\text{M}^+$ ): 381.1814, found: 381.1817

**1-benzyl 3-(2-isopropyl-5-methylcyclohexyl) 4-phenyl-5-(trimethylsilyl)-1H-pyrazole-1,3(4H,5H)-**

**dicarboxylate (14a)** White crystalline solid, mp: 140-142 °C,  $^1\text{H NMR}$  ( $\text{CDCl}_3$ , 400MHz)  $\delta$  7.35 (m, 2H),

7.30-7.10 (m, 6H), 7.00 (d, 2H,  $J= 6.8\text{ Hz}$ ), 5.25 (d, 1H,  $J= 12.2\text{ Hz}$ ), 5.15 (d, 1H, 12.2 Hz), 4.55 (m, 1H),

4.20 (d, 1H,  $J=7.1\text{ Hz}$ ), 3.80 (d, 1H,  $J=7.1\text{ Hz}$ ), 1.70-1.55 (m, 2H), 1.50 (m, 5H), 1.30-1.10 (m, 3H), 0.95-

0.80 (m, 1H), 0.70 (m, 7H), 0.50 (d, 3H,  $J= 6.9\text{ Hz}$ ), 0.00 (s, 9H);  $^{13}\text{C NMR}$  ( $\text{CDCl}_3$ , 100 MHz)  $\delta$  major

diastereomer: 160.9, 152.8, 149.6, 141.1, 129.0, 128.5, 128.3, 127.6, 127.2, 76.0, 68.2, 60.6, 53.4, 46.7,

40.1, 34.0, 31.3, 26.5, 23.7, 21.9, 20.5, 16.5, -2.89; **HR-MS** ( $\text{FAB}^+$ ) calcd for  $\text{C}_{31}\text{H}_{42}\text{O}_4\text{N}_2\text{Si}$  ( $\text{MH}^+$ ):

535.2992, found: 535.2970, diastereomers ratio 63:37%.

**1-benzyl 5-(2-isopropyl-5-methylcyclohexyl) 4-phenyl-1H-pyrazole-1,5(4H,5H)-dicarboxylate (14c)**

Yellow oil;  $^1\text{H NMR}$  ( $\text{CDCl}_3$ , 400MHz)  $\delta$  7.50-7.20 (m, 8H), 7.13 (t, 2H,  $J= 6.5\text{ Hz}$ ), 6.90 (bs, 1H), 5.40-

5.15 (m, 2H), 4.75 (m, 1H), 4.65 (m, 1H), 4.30 (d, 1H, major isomer  $J=4.7\text{ Hz}$ , minor isomer  $J= 5.8\text{ Hz}$ ),

2.05-1.75 (m, 2H), 1.70 (m, 2H), 1.55-1.30 (m, 2H), 0.60-0.50 (m, 1H), 0.95-0.80 (m, 8H), 0.80-0.65 (m,

4H);  $^{13}\text{C NMR}$  ( $\text{CDCl}_3$ , 100MHz) Major diastereoisomer:  $\delta$  169.3, 152.4, 146.3, 137.2, 135.8, 129.4,

128.6, 128.5, 128.3, 127.5, 127.3, 76.2, 68.2, 66.4, 58.0, 46.8, 40.4, 34.1, 31.4, 26.2, 23.4, 22.0, 20.8,

16.2; Minor diastereoisomer: 169.3, 146.2, 137.0, 135.6, 76.1, 68.0, 66.1, 46.7, 40.4, 26.0, 23.0, 22.0, 20.7,

16.0; **HR-MS** ( $\text{EI}^+$ ) calcd for:  $\text{C}_{28}\text{H}_{34}\text{O}_4\text{N}_2$  ( $\text{MH}^+$ ): 463.2597, found: 463.2586

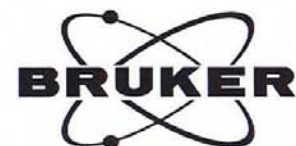

Table 1, Cmpd. 5b

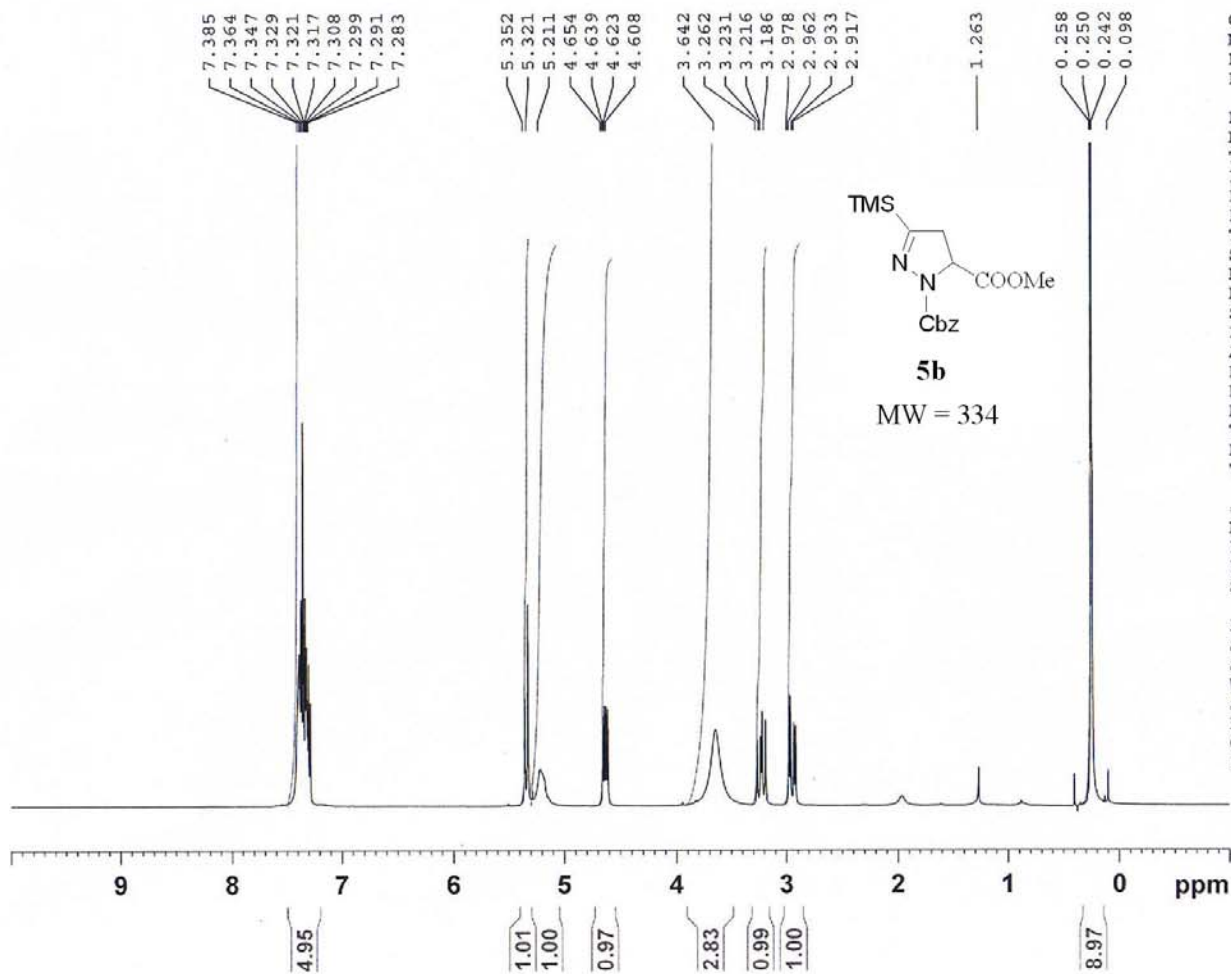

Current Data Parameters  
NAME 400-08122006  
EXPNO 30  
PROCNO 1

F2 - Acquisition Parameters  
Date\_ 20060812  
Time\_ 22.37  
INSTRUM spect  
PROBHD 5 mm QNP 1H/13  
PULPROG zg30  
TD 65536  
SOLVENT CDCl3  
NS 16  
DS 2  
SWH 8278.146 Hz  
FIDRES 0.126314 Hz  
AQ 3.9584243 sec  
RG 45.3  
DW 60.400 usec  
DE 6.00 usec  
TE 296.2 K  
D1 1.00000000 sec  
TD0 1

==== CHANNEL f1 =====  
NUC1 1H  
P1 12.25 usec  
PL1 0.00 dB  
SFO1 400.1324710 MHz

F2 - Processing parameters  
SI 32768  
SF 400.1300000 MHz  
WDW EM  
SSB 0  
LB 0.30 Hz  
GB 0  
PC 1.00

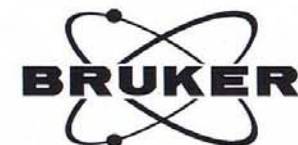

Table 1, Cmpd. 5b

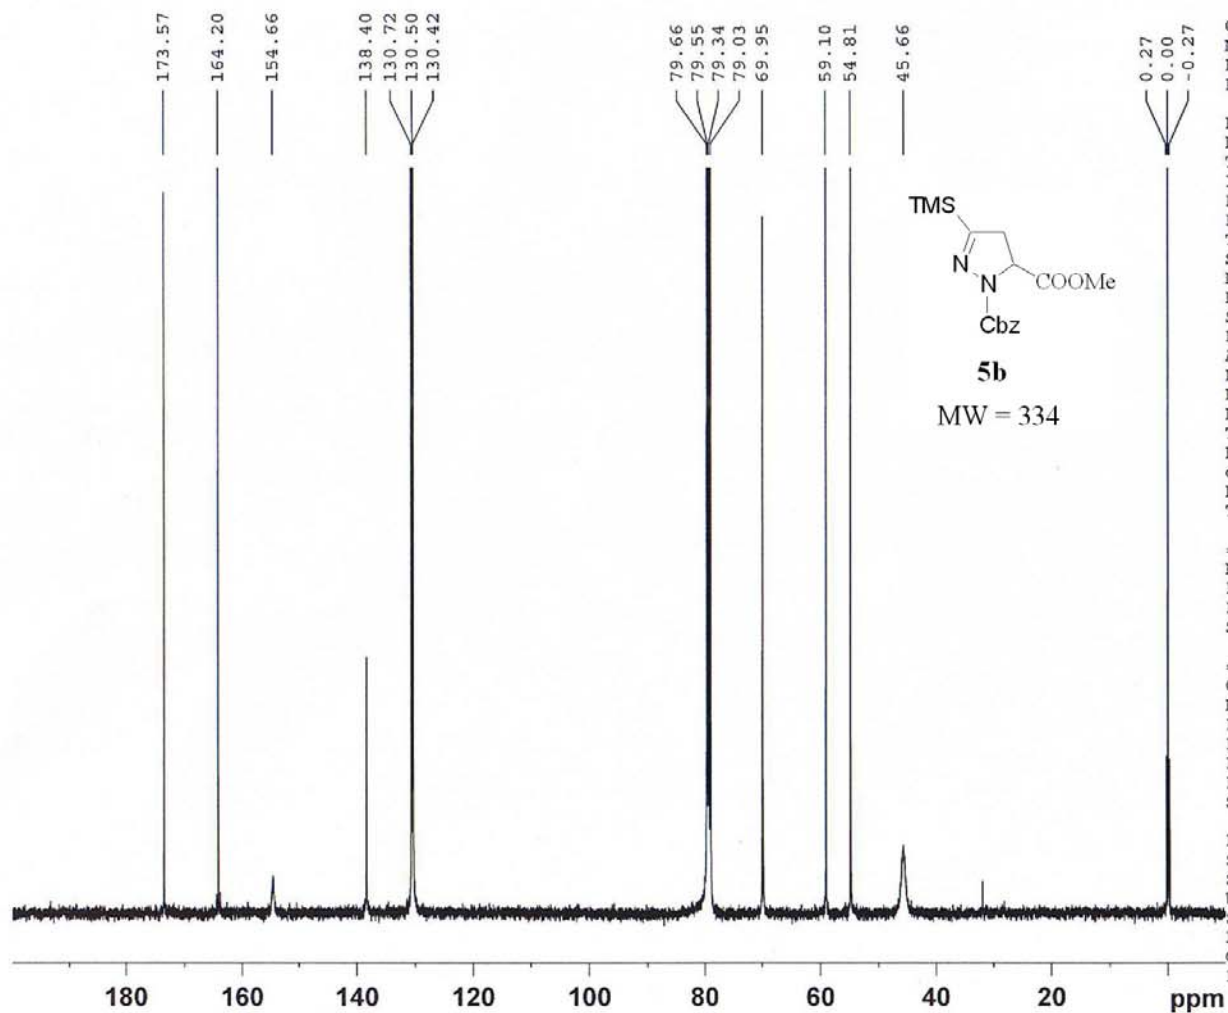

Current Data Parameters  
NAME 400-08132006  
EXPNO 11  
PROCNO 1

F2 - Acquisition Parameters  
Date\_ 20060814  
Time\_ 8.43  
INSTRUM spect  
PROBHD 5 mm QNP 1H/13  
PULPROG zgpg30  
TD 65536  
SOLVENT CDCl3  
NS 23500  
DS 4  
SWH 23980.814 Hz  
FIDRES 0.365918 Hz  
AQ 1.3664756 sec  
RG 1290.2  
DW 20.850 usec  
DE 6.00 usec  
TE 296.2 K  
D1 2.00000000 sec  
d11 0.03000000 sec  
DELTA 1.89999998 sec  
TDO 1

==== CHANNEL f1 =====  
NUC1 13C  
P1 12.50 usec  
PL1 0.00 dB  
SFO1 100.6228298 MHz

==== CHANNEL f2 =====  
CPDPRG2 waltz16  
NUC2 1H  
PCPD2 80.00 usec  
PL2 0.00 dB  
PL12 16.30 dB  
PL13 16.30 dB  
SFO2 400.1316005 MHz

F2 - Processing parameters  
SI 32768  
SF 100.6125395 MHz  
WDW EM  
SSB 0  
LB 1.00 Hz  
GB 0  
PC 1.40

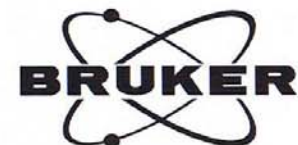

Table 1, Cmpd. 5c

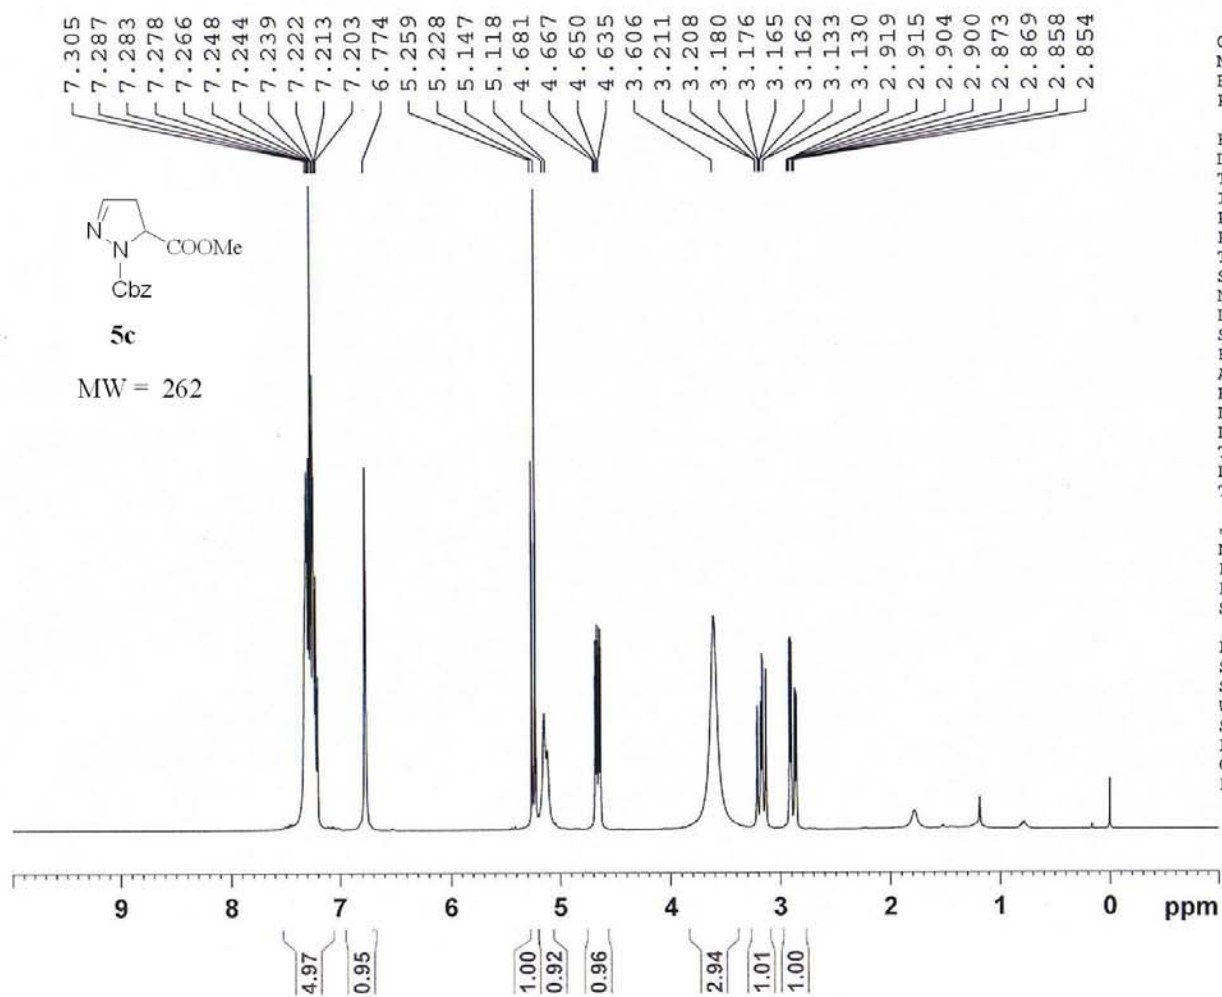

Current Data Parameters  
NAME WM-400-Aug06-2005  
EXPNO 20  
PROCNO 1

F2 - Acquisition Parameters  
Date 20050806  
Time 15.51  
INSTRUM spect  
PROBHD 5 mm QNP 1H/13  
PULPROG zg30  
TD 65536  
SOLVENT CDCl3  
NS 16  
DS 2  
SWH 8278.146 Hz  
FIDRES 0.126314 Hz  
AQ 3.9584243 sec  
RG 64  
DW 60.400 usec  
DE 6.00 usec  
TE 298.2 K  
D1 1.00000000 sec  
TD0 1

==== CHANNEL f1 =====  
NUC1 1H  
P1 12.25 usec  
PL1 0.00 dB  
SFO1 400.1324710 MHz

F2 - Processing parameters  
SI 32768  
SF 400.1300320 MHz  
WDW EM  
SSB 0  
LB 0.30 Hz  
GB 0  
PC 1.00

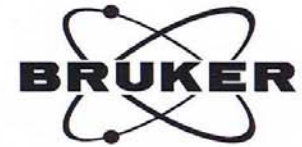

Table 1, Cmpd. 5c

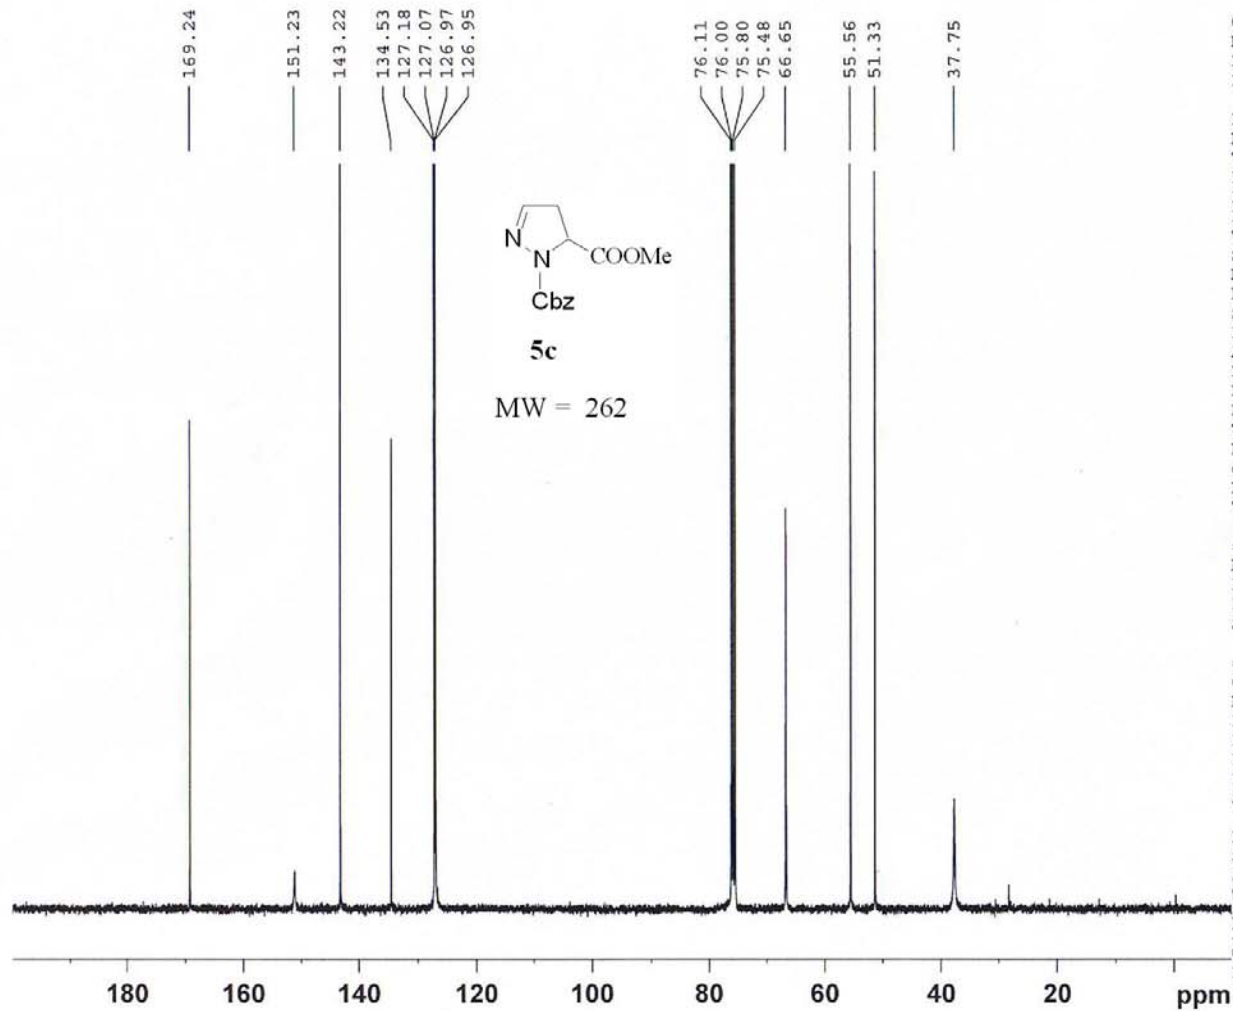

Current Data Parameters  
NAME WM-400-Aug10-2005  
EXPNO 31  
PROCNO 1

F2 - Acquisition Parameters  
Date\_ 20050811  
Time 1.21  
INSTRUM spect  
PROBHD 5 mm QNP 1H/13  
PULPROG zgpg30  
TD 65536  
SOLVENT CDCl3  
NS 4700  
DS 4  
SWH 23980.814 Hz  
FIDRES 0.365918 Hz  
AQ 1.3664756 sec  
RG 3251  
DW 20.850 usec  
DE 6.00 usec  
TE 302.2 K  
D1 2.00000000 sec  
d11 0.03000000 sec  
DELTA 1.89999998 sec  
TD0 1

=====  
CHANNEL f1  
NUC1 13C  
P1 12.50 usec  
PL1 0.00 dB  
SFO1 100.6228298 MHz

=====  
CHANNEL f2  
CPDPRG2 waltz16  
NUC2 1H  
PCPD2 80.00 usec  
PL2 0.00 dB  
PL12 16.30 dB  
PL13 16.30 dB  
SFO2 400.1316005 MHz

F2 - Processing parameters  
SI 32768  
SF 100.6129016 MHz  
WDW EM  
SSB 0  
LB 1.00 Hz  
GB 0  
PC 1.40

Table 1, Cmpd. 6b

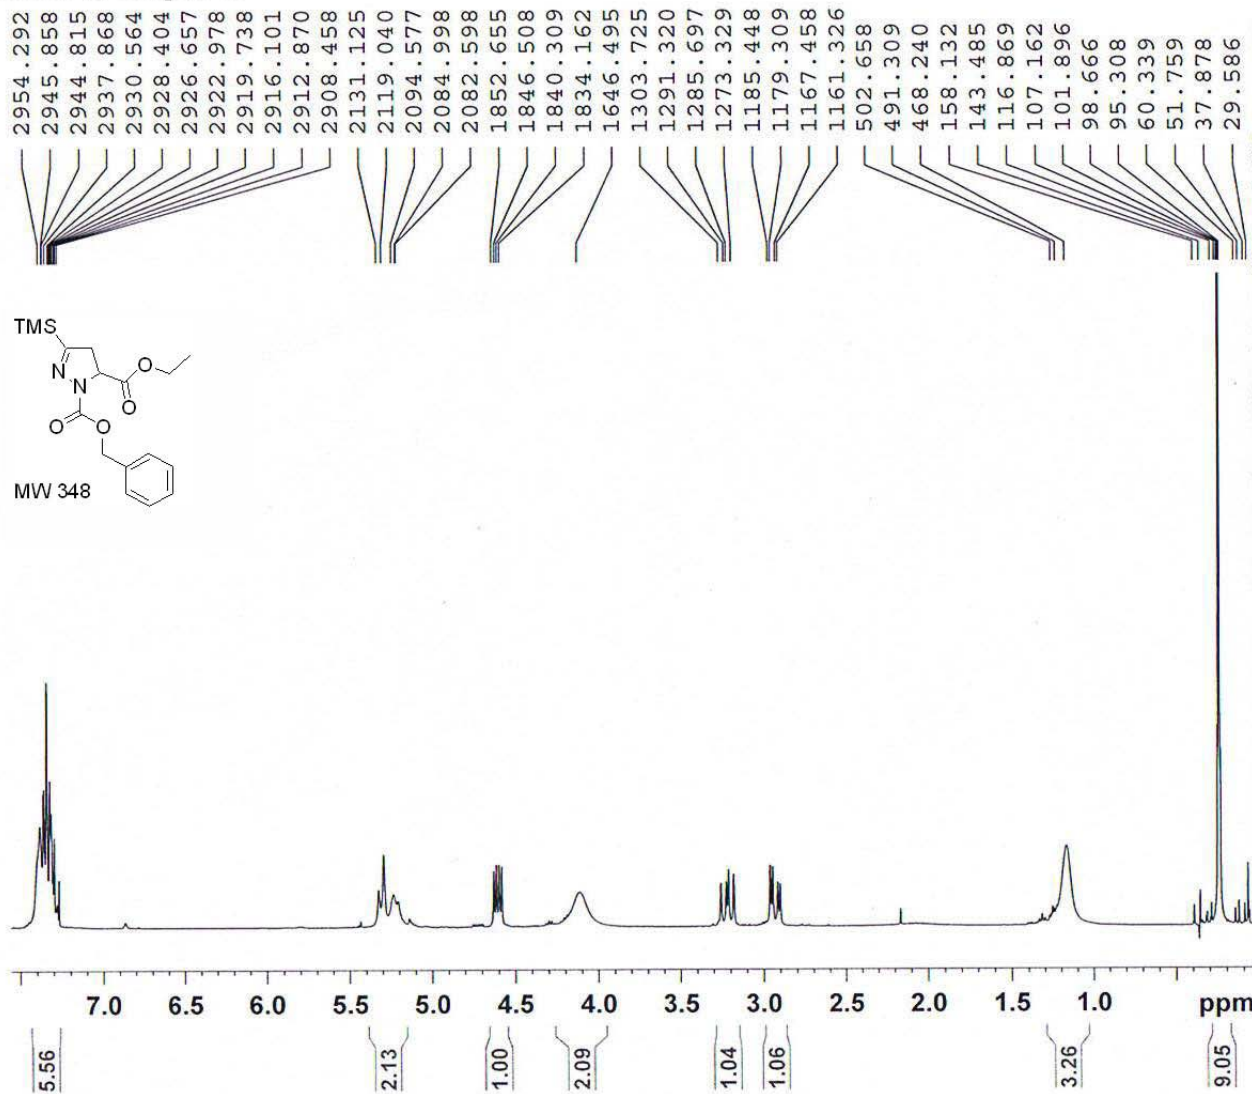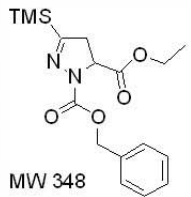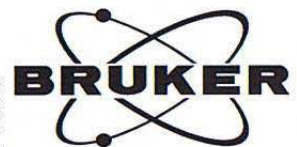

Current Data Parameters  
 NAME 400-Aug03-2006  
 EXPNO 10  
 PROCNO 1

F2 - Acquisition Parameters  
 Date 20060803  
 Time 15.31  
 INSTRUM spect  
 PROBHD 5 mm QNP 1H/13  
 PULPROG zg30  
 TD 65536  
 SOLVENT CDCl3  
 NS 8  
 DS 2  
 SWH 8278.146 Hz  
 FIDRES 0.126314 Hz  
 AQ 3.9584243 sec  
 RG 90.5  
 DW 60.400 usec  
 DE 6.00 usec  
 TE 296.2 K  
 D1 1.00000000 sec  
 TD0 1

==== CHANNEL f1 =====  
 NUC1 1H  
 P1 12.25 usec  
 PL1 0.00 dB  
 SFO1 400.1324710 MHz

F2 - Processing parameters  
 SI 32768  
 SF 400.1300059 MHz  
 WDW EM  
 SSB 0  
 LB 0.30 Hz  
 GB 0  
 PC 1.00

Table 1, Cmpd. 6b

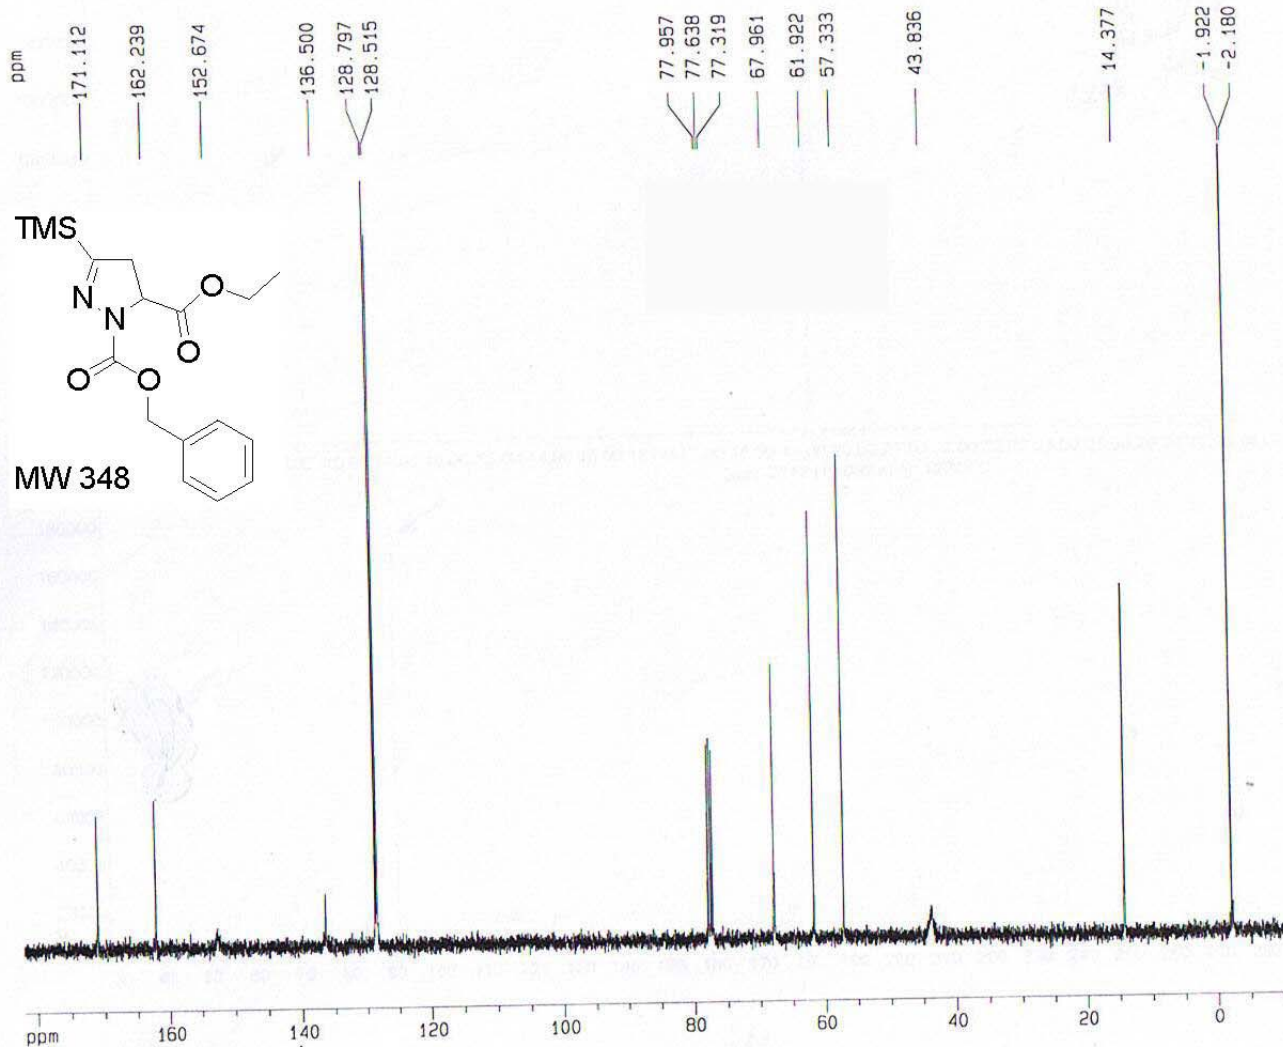

Current Data Parameters  
 NAME Dragan4  
 EXPNO 17  
 PROCNO 1

F2 - Acquisition Parameters  
 Date\_ 20050307  
 Time 13.24  
 INSTRUM spect  
 PROBHD 5 mm QNP 1H  
 PULPROG zgpg30  
 TD 65536  
 SOLVENT CDCl3  
 NS 70  
 DS 4  
 SWH 25125.629 Hz  
 FIDRES 0.383387 Hz  
 AQ 1.3042164 sec  
 RG 4096  
 DW 19.900 usec  
 DE 6.00 usec  
 TE 300.0 K  
 D1 0.50000000 sec  
 D11 0.03000000 sec  
 D12 0.00002000 sec

----- CHANNEL f1 -----  
 NUC1 13C  
 P1 12.50 usec  
 PL1 0.00 dB  
 SFO1 100.6237959 MHz

----- CHANNEL f2 -----  
 CPDPRG2 waltz16  
 NUC2 1H  
 PCPD2 100.00 usec  
 PL2 0.00 dB  
 PL12 19.00 dB  
 PL13 19.00 dB  
 SFO2 400.1316005 MHz

F2 - Processing parameters  
 SI 32768  
 SF 100.6127290 MHz  
 WDW EM  
 SSB 0  
 LB 1.00 Hz  
 GB 0  
 PC 1.40

1D NMR plot parameters  
 CX 20.00 cm  
 F1P 182.066 ppm  
 F1 18318.13 Hz  
 F2P -10.123 ppm  
 F2 -1018.46 Hz  
 PPMCM 9.60941 ppm/cm  
 HZCM 966.82941 Hz/cm

**Table 1, Cmpd. 6c**

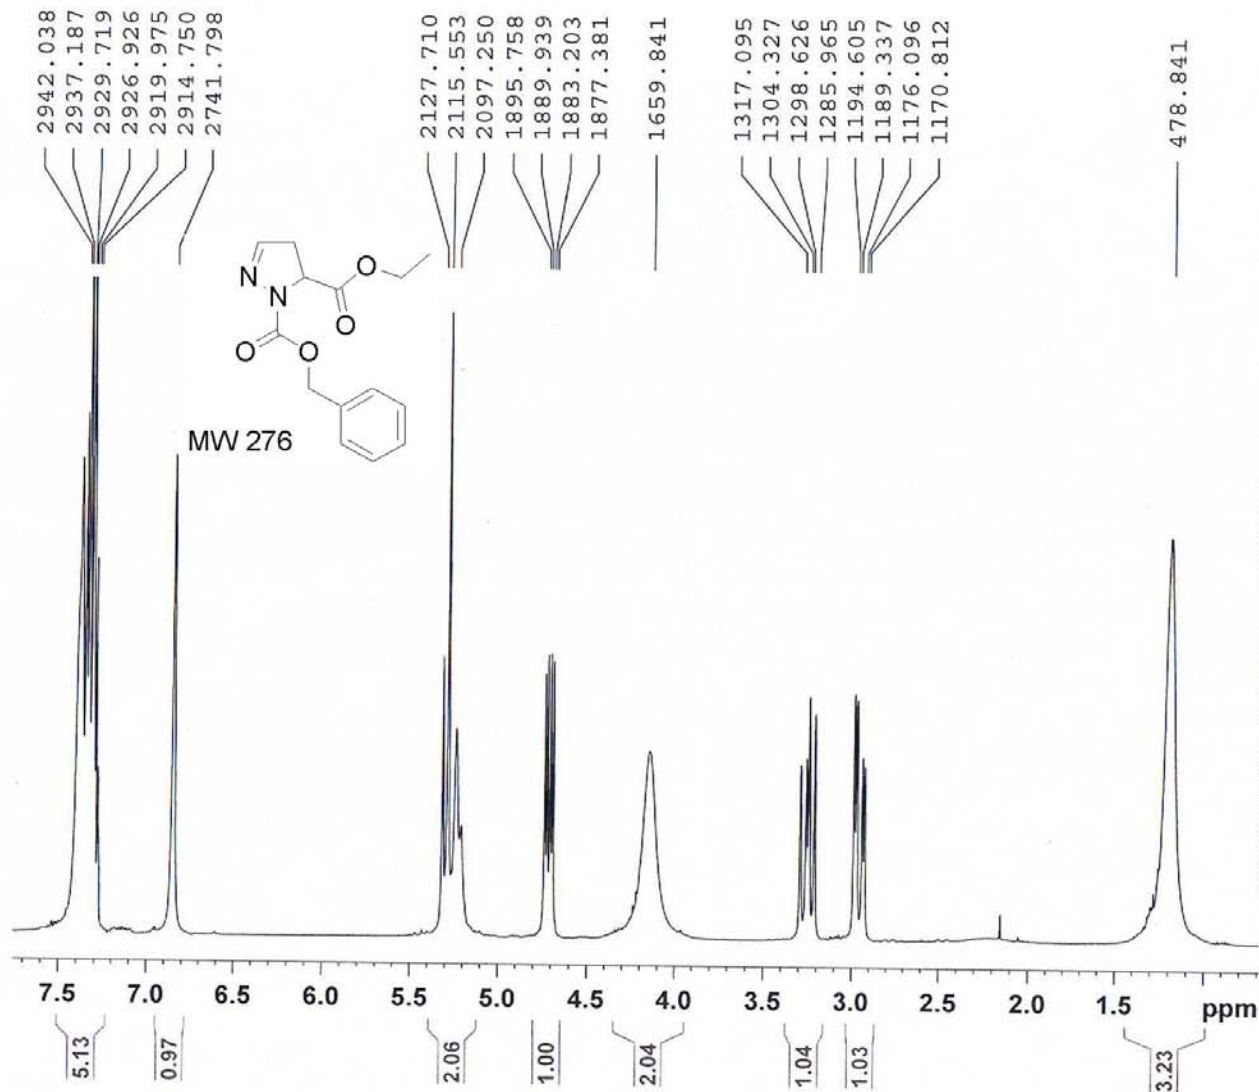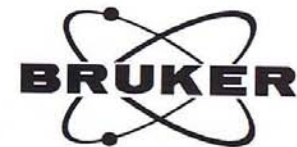

Current Data Parameters  
 NAME 400-Aug03-2006  
 EXPNO 20  
 PROCNO 1

F2 - Acquisition Parameters  
 Date\_ 20060803  
 Time 15.38  
 INSTRUM spect  
 PROBHD 5 mm QNP 1H/13  
 PULPROG zg30  
 TD 65536  
 SOLVENT CDCl3  
 NS 8  
 DS 2  
 SWH 8278.146 Hz  
 FIDRES 0.126314 Hz  
 AQ 3.9584243 sec  
 RG 57  
 DW 60.400 usec  
 DE 6.00 usec  
 TE 296.2 K  
 D1 1.00000000 sec  
 TDO 1

==== CHANNEL f1 =====  
 NUC1 1H  
 P1 12.25 usec  
 PL1 0.00 dB  
 SFO1 400.1324710 MHz

F2 - Processing parameters  
 SI 32768  
 SF 400.1299994 MHz  
 WDW EM  
 SSB 0  
 LB 0.30 Hz  
 GB 0  
 PC 1.00



Table 1, Cmpd. 6c

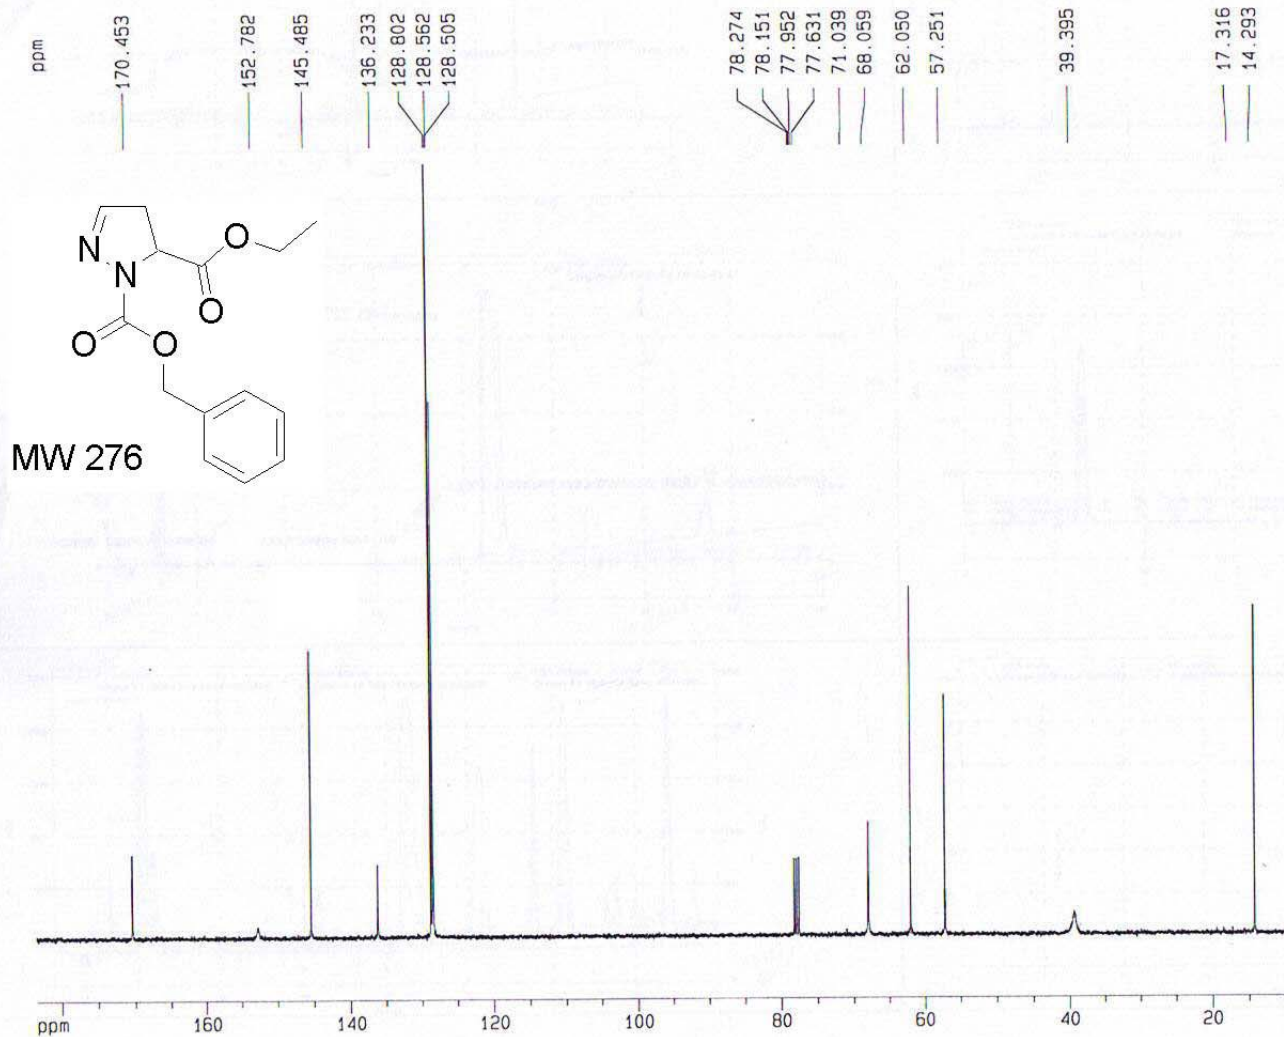

Current Data Parameters  
NAME Dragon4  
EXPNO 14  
PROCNO 1

F2 - Acquisition Parameters  
Date\_ 20050307  
Time 13.10  
INSTRUM spect  
PROBHD 5 mm GNP 1H  
PULPROG zgpg30  
TD 65536  
SOLVENT CDC13  
NS 100  
DS 4  
SWH 25125.629 Hz  
FIDRES 0.383387 Hz  
AQ 1.3042164 sec  
RG 4096  
DN 19.900 usec  
DE 6.00 usec  
TE 300.0 K  
D1 0.50000000 sec  
D11 0.03000000 sec  
D12 0.00002000 sec

----- CHANNEL f1 -----  
NUC1 13C  
P1 12.50 usec  
PL1 0.00 dB  
SFO1 100.6237959 MHz

----- CHANNEL f2 -----  
CPDPRG2 waltz16  
NUC2 1H  
PCPD2 100.00 usec  
PL2 0.00 dB  
PL12 19.00 dB  
PL13 19.00 dB  
SFO2 400.1316005 MHz

F2 - Processing parameters  
SI 32768  
SF 100.6127290 MHz  
WDW EM  
SSB 0  
LB 1.00 Hz  
GB 0  
PC 1.40

1D NMR plot parameters  
CX 20.00 cm  
F1P 183.549 ppm  
F1 18467.33 Hz  
F2P 9.156 ppm  
F2 921.17 Hz  
PPMCM 8.71965 ppm/cm  
HZCM 877.30817 Hz/cm

Table 1, Cmpd 7b

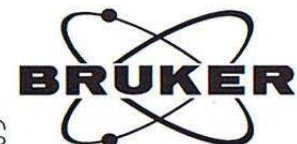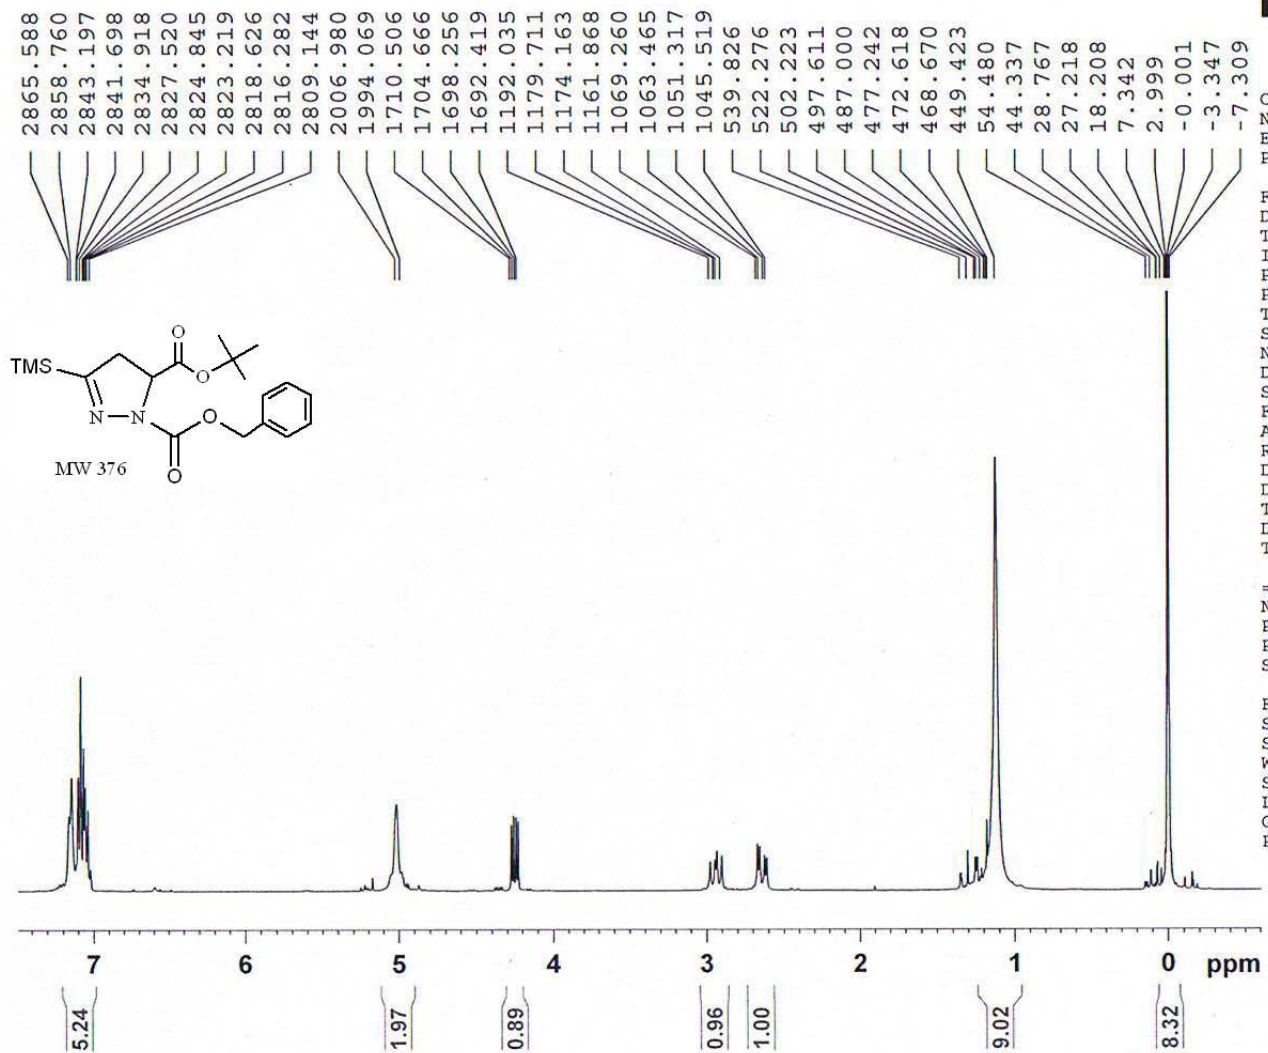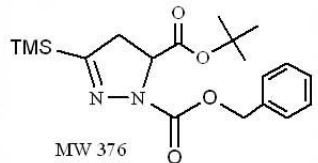

Current Data Parameters  
 NAME 400-Jul10-2006  
 EXPNO 10  
 PROCNO 1

F2 - Acquisition Parameters  
 Date\_ 20060710  
 Time\_ 19.13  
 INSTRUM spect  
 PROBHD 5 mm QNP 1H/13  
 PULPROG zg30  
 TD 65536  
 SOLVENT CDCl3  
 NS 8  
 DS 2  
 SWH 8278.146 Hz  
 FIDRES 0.126314 Hz  
 AQ 3.9584243 sec  
 RG 28.5  
 DW 60.400 usec  
 DE 6.00 usec  
 TE 296.2 K  
 D1 1.00000000 sec  
 TDO 1

==== CHANNEL f1 =====  
 NUC1 1H  
 P1 12.25 usec  
 PL1 0.00 dB  
 SFO1 400.1324710 MHz

F2 - Processing parameters  
 SI 32768  
 SF 400.1300956 MHz  
 WDW EM  
 SSB 0  
 LB 0.30 Hz  
 GB 0  
 PC 1.00

Table 1, Cmpd 7b

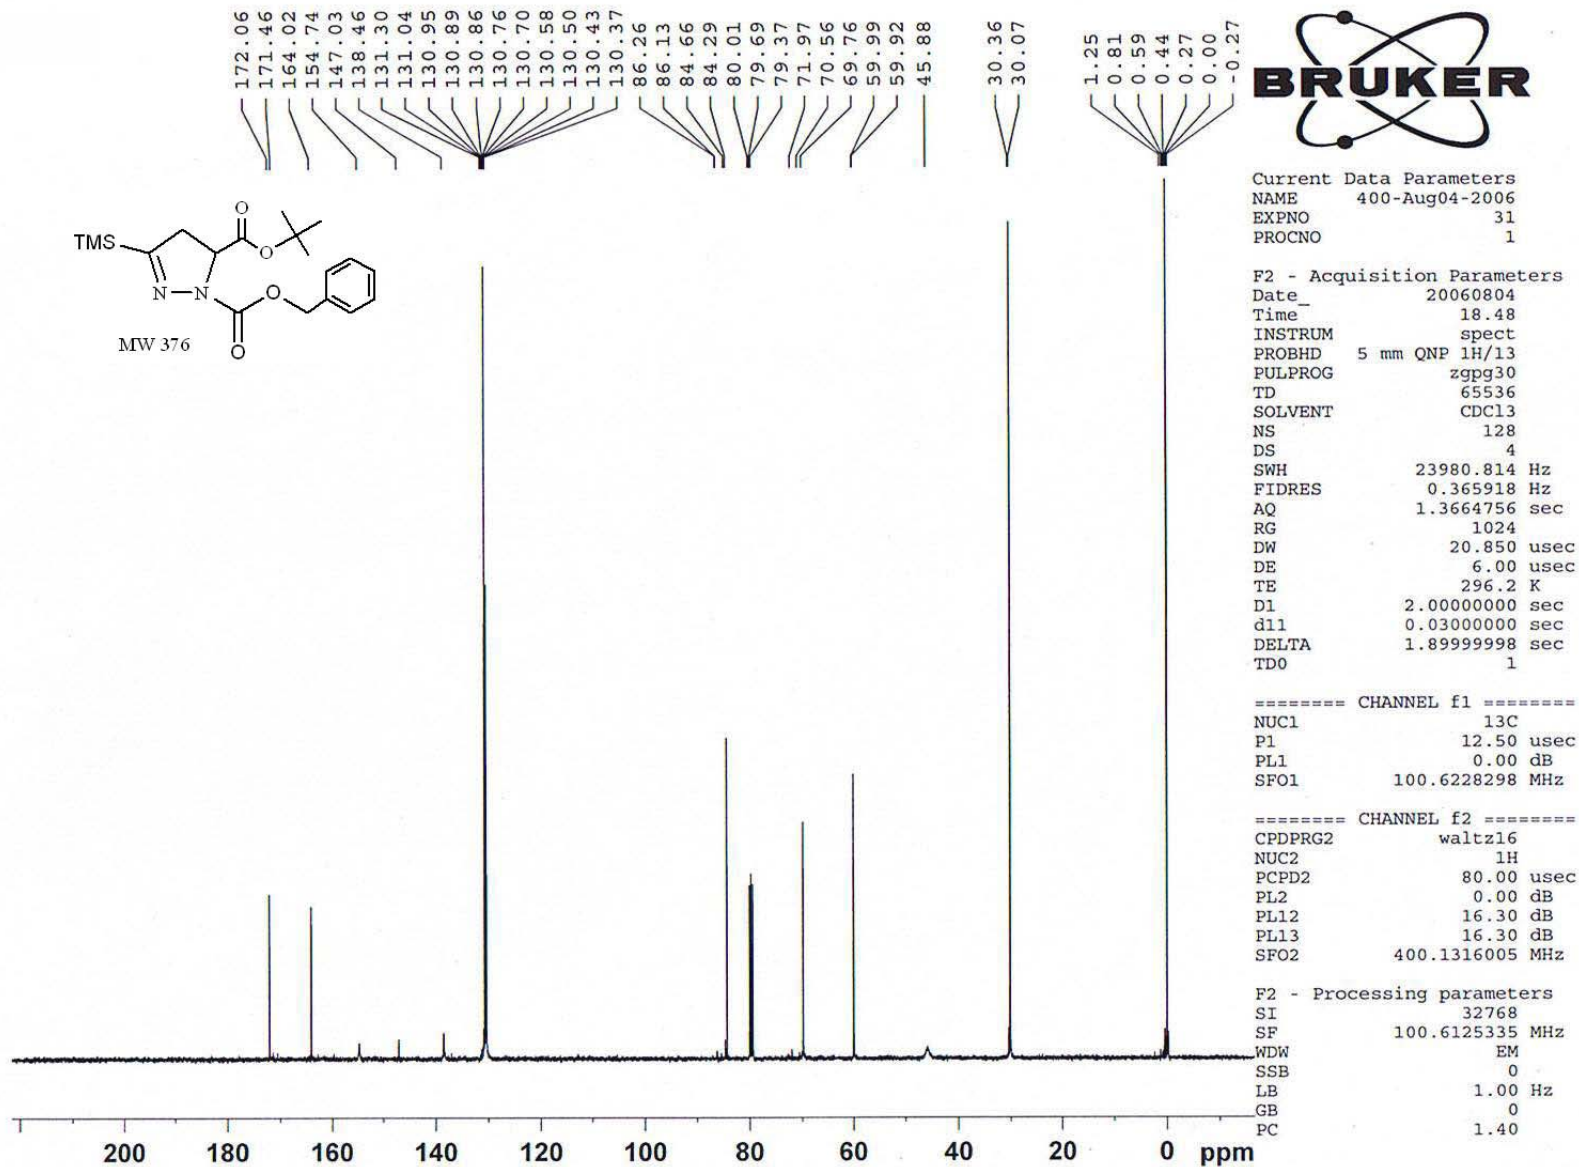

Table 1, Cmpd 7c

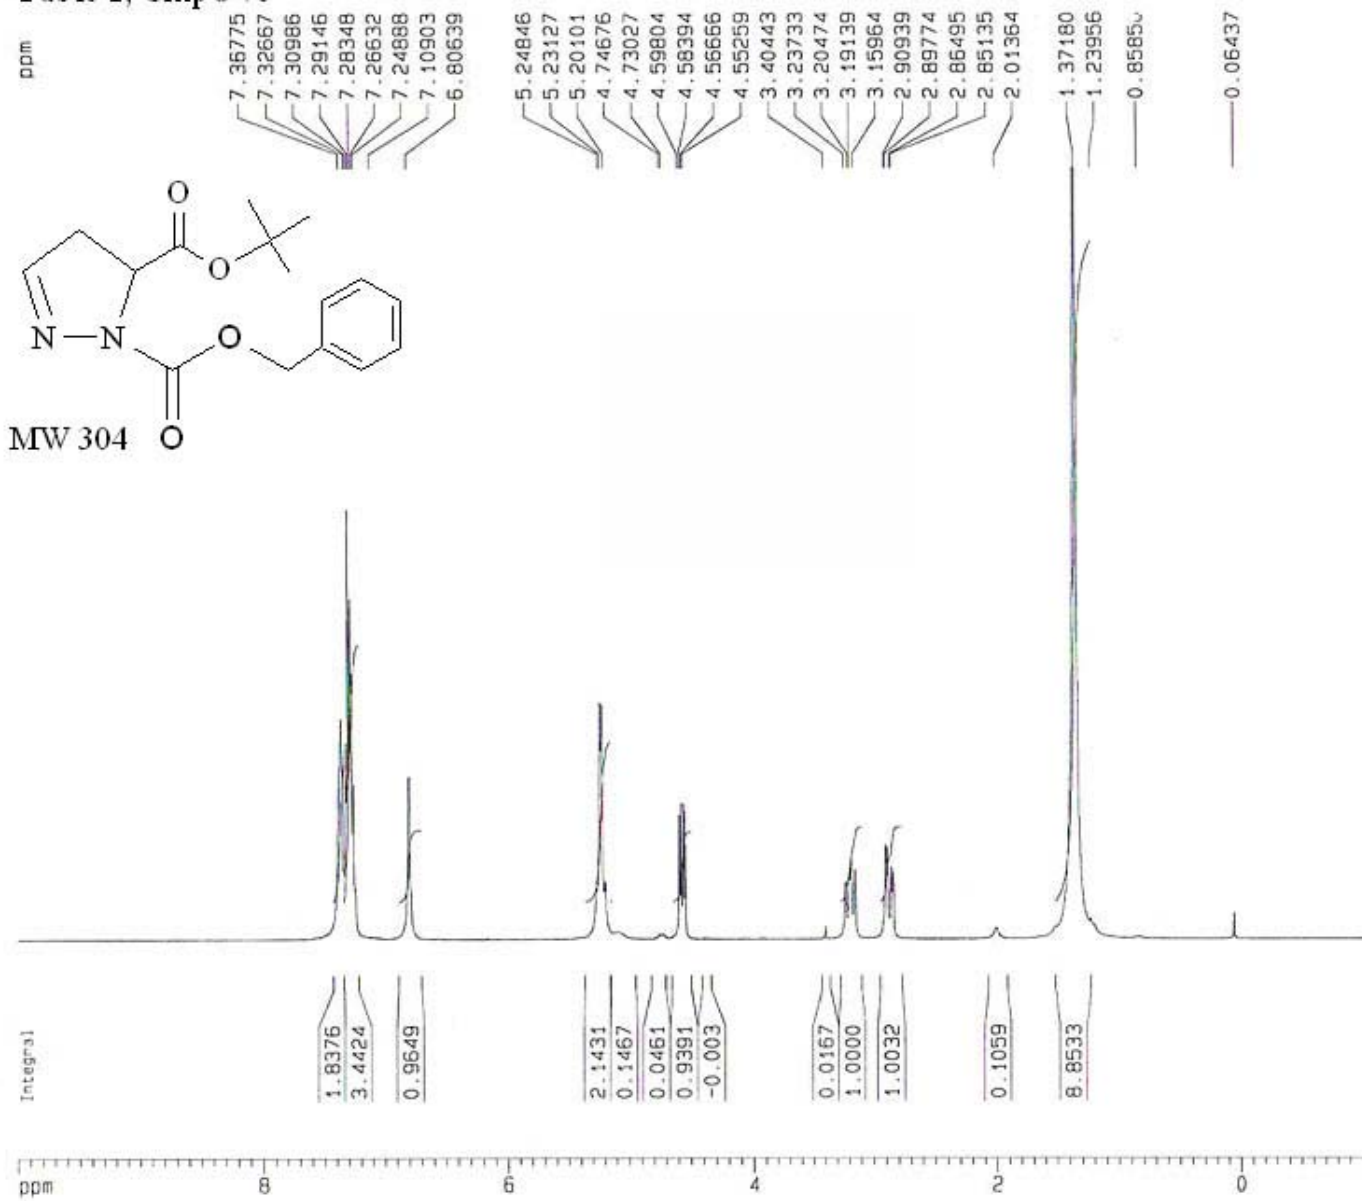

Current Data Parameters  
 NAME WM-P7-14-B  
 EXPNO 1  
 PROCNO 1

F2 - Acquisition Parameters  
 Date\_ 20050513  
 Time 18.51  
 INSTRUM spect  
 PROBHD 5 mm GNP 1H  
 PULPROG zg30  
 TD 65536  
 SOLVENT CDCl3  
 NS 8  
 DS 2  
 SWH 8278.146 Hz  
 FIDRES 0.126314 Hz  
 AQ 3.9584243 sec  
 RG 32  
 DW 60.400 usec  
 DE 6.00 usec  
 TE 300.0 K  
 D1 1.0000000 sec

----- CHANNEL f1 -----  
 NUC1 1H  
 P1 12.00 usec  
 PL1 0.00 dB  
 SFO1 400.1324710 MHz

F2 - Processing parameters  
 S1 32768  
 SF 400.1300000 MHz  
 WDM EM  
 SSB 0  
 LB 0.30 Hz  
 GB 0  
 PC 1.00

1D NMR plot parameters  
 CX 20.00 cm  
 F1P 10.000 ppm  
 F1 4001.30 Hz  
 F2P -1.000 ppm  
 F2 -400.13 Hz  
 PPMCM 0.55000 ppm/cm  
 HZCM 220.07150 Hz/cm

Table 1, Cmpd 7c

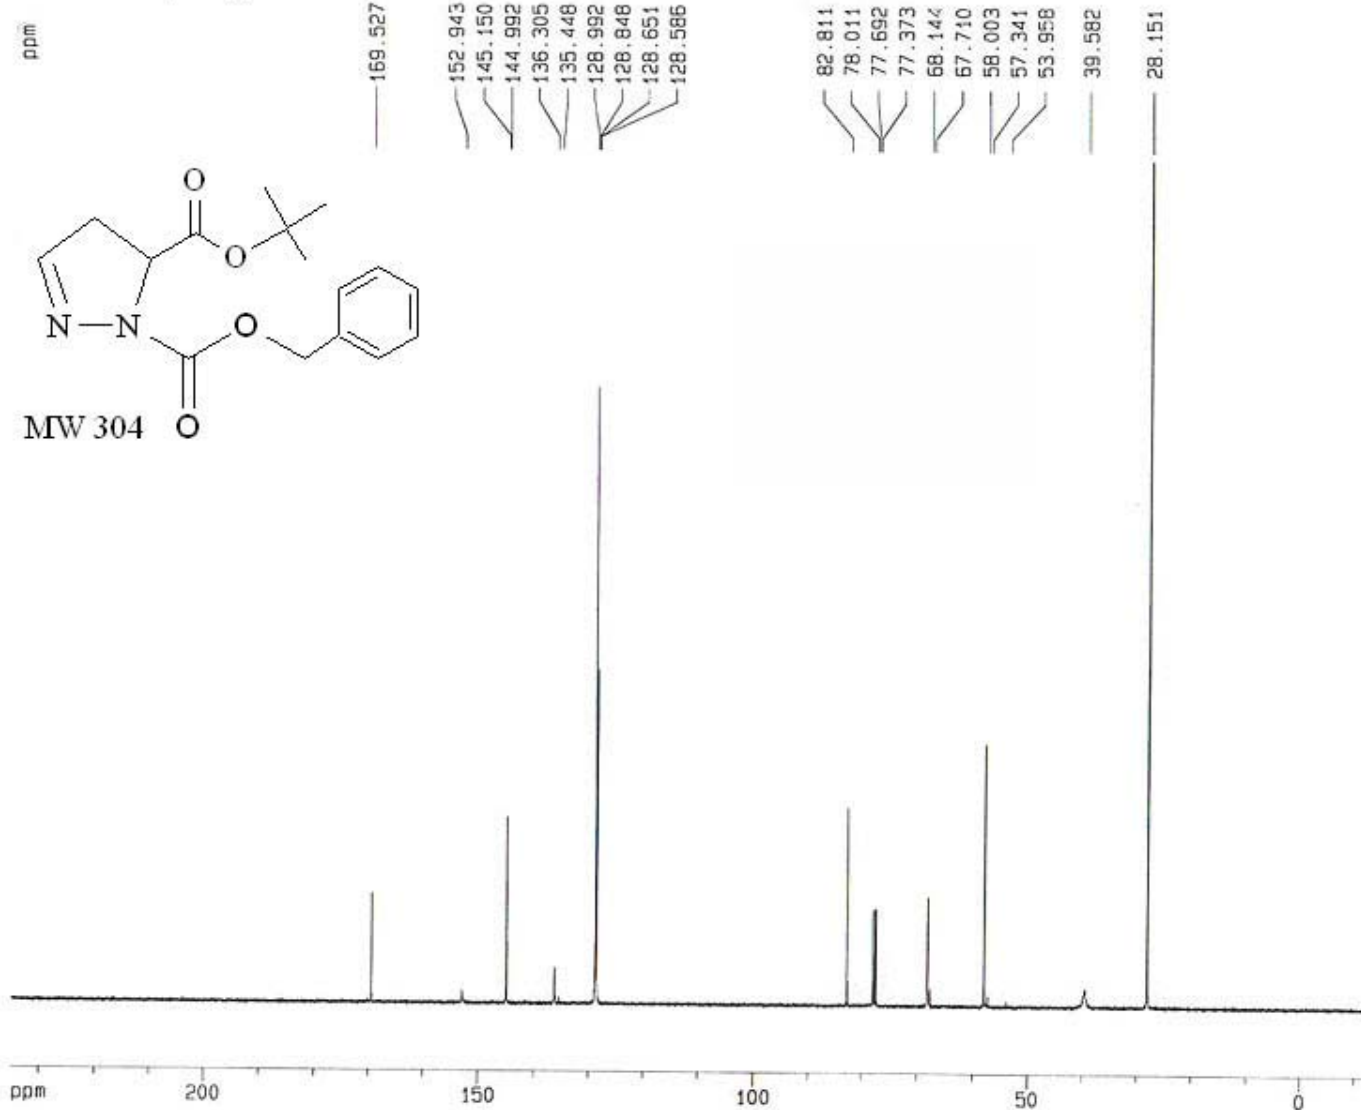

Current Date Parameters  
 NAME: 2005-07-14-6  
 EXPNO: 3  
 PROCNO: 1

F2 - Acquisition Parameters  
 Date\_: 20050517  
 Time: 12.07  
 INSTRUM: spect  
 PROBHD: 5 mm QNP 1H  
 PULPROG: zgpg30  
 TD: 65536  
 SOLVENT: CDCl3  
 NS: 460  
 DS: 4  
 SWH: 25.629 Hz  
 FIDRES: 0.383387 Hz  
 AQ: 1.3042164 sec  
 RG: 16384  
 DW: 19.900 usec  
 DE: 6.00 usec  
 TE: 300.0 K  
 D1: 0.50000000 sec  
 D11: 0.03000000 sec  
 D12: 0.00002000 sec

\*\*\*\*\* CHANNEL f1 \*\*\*\*\*  
 NUC1: 13C  
 P1: 12.50 usec  
 PL1: 0.00 dB  
 SFO1: 100.6237959 MHz

\*\*\*\*\* CHANNEL f2 \*\*\*\*\*  
 CPDPRG2: waltz16  
 NUC2: 1H  
 PCPD2: 100.00 usec  
 PL2: 0.00 dB  
 PL12: 19.00 dB  
 PL13: 19.00 dB  
 SFO2: 400.1316005 MHz

F2 - Processing parameters  
 S1: 32768  
 SF: 100.6127290 MHz  
 WDW: EM  
 SSB: 0  
 LB: 1.00 Hz  
 GB: 0  
 PC: 1.40

1D NMR plot parameters  
 CX: 20.00 cm  
 F1P: 234.858 ppm  
 F1: 23629.72 Hz  
 F2P: -14.858 ppm  
 F2: -1495.91 Hz  
 PPMCK: 12.48631 ppm/cm  
 HZCM: 1256.28149 Hz/cm

Table 1, Cmpd. 8b

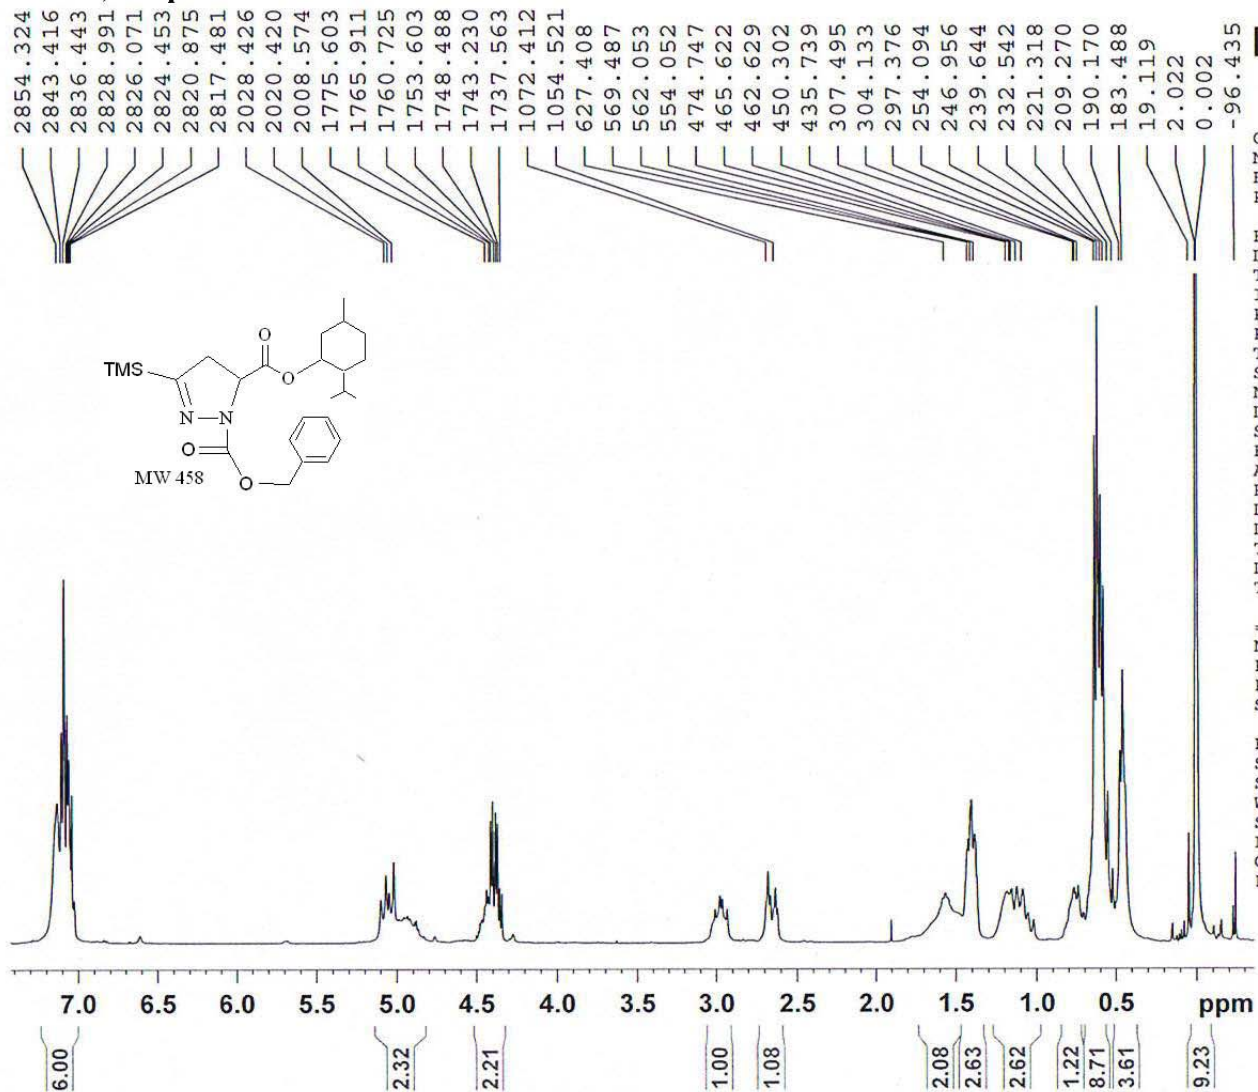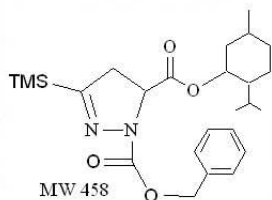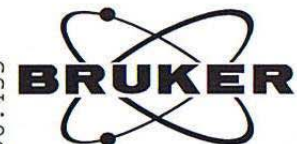

Current Data Parameters  
 NAME 400-Jul24-2006  
 EXPNO 40  
 PROCNO 1

F2 - Acquisition Parameters  
 Date\_ 20060724  
 Time\_ 17.16  
 INSTRUM spect  
 PROBHD 5 mm QNP 1H/13  
 PULPROG zg30  
 TD 65536  
 SOLVENT CDCl3  
 NS 8  
 DS 2  
 SWH 8278.146 Hz  
 FIDRES 0.126314 Hz  
 AQ 3.9584243 sec  
 RG 20.2  
 DW 60.400 usec  
 DE 6.00 usec  
 TE 296.2 K  
 D1 1.00000000 sec  
 TDO 1

==== CHANNEL f1 =====  
 NUC1 1H  
 P1 12.25 usec  
 PL1 0.00 dB  
 SFO1 400.1324710 MHz

F2 - Processing parameters  
 SI 32768  
 SF 400.1300930 MHz  
 WDW EM  
 SSB 0  
 LB 0.30 Hz  
 GB 0  
 PC 1.00

Table 1, Cmpd. 8b

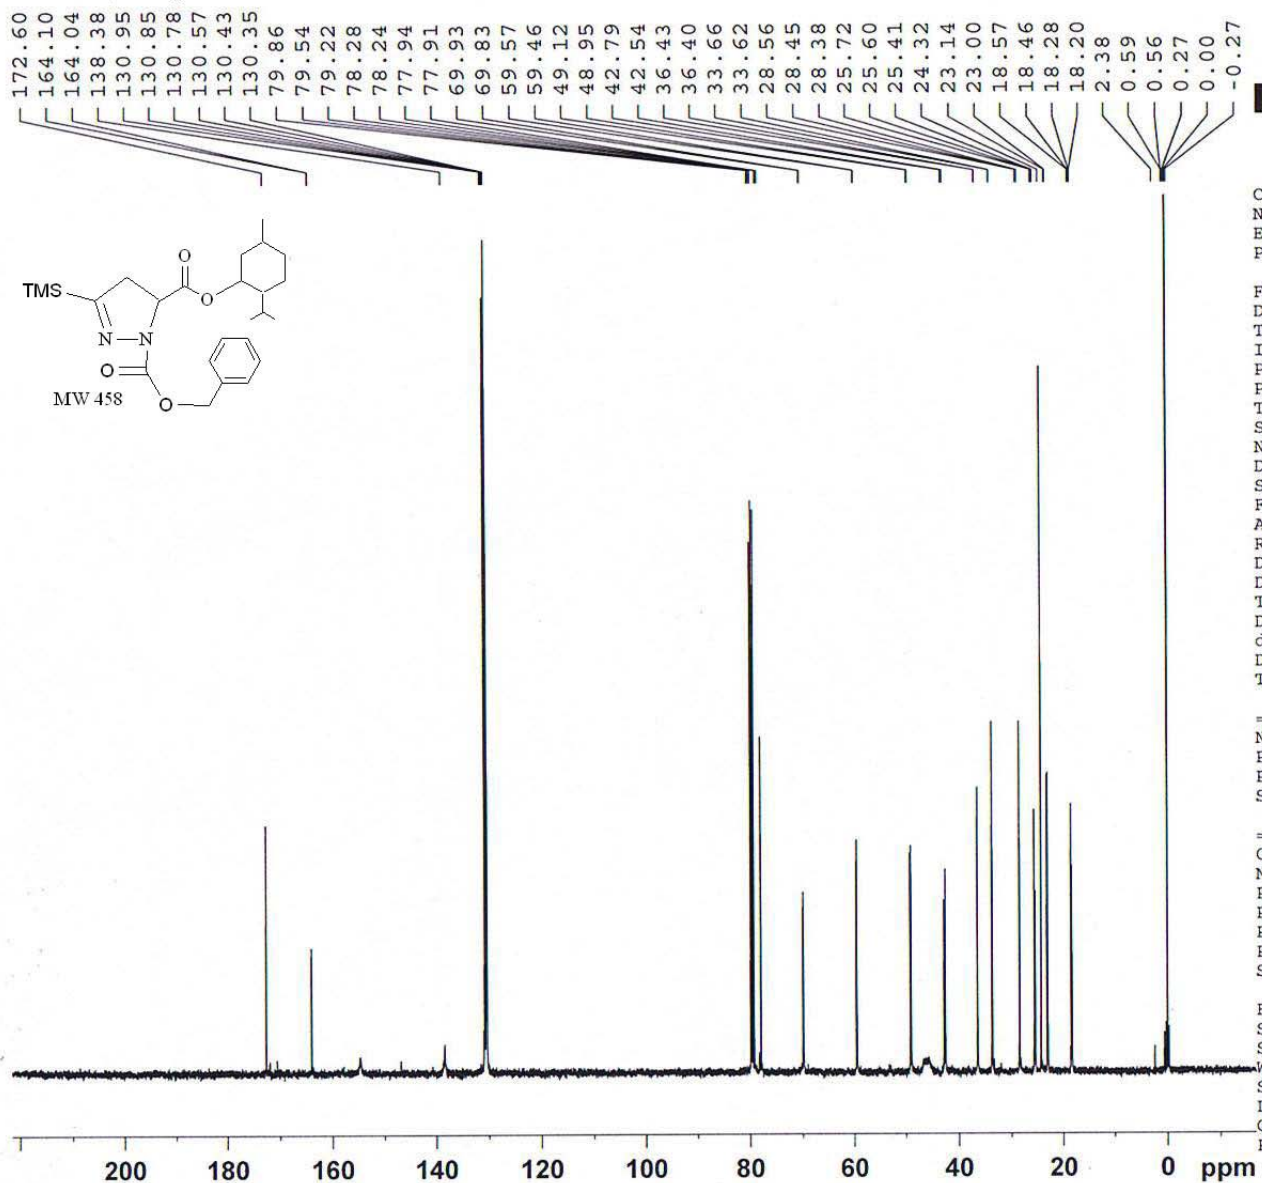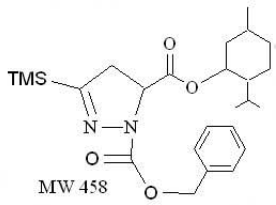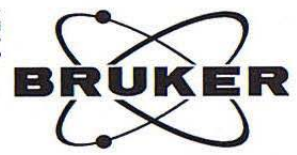

Current Data Parameters  
 NAME 400-Aug10-2006  
 EXPNO 40  
 PROCNO 998

F2 - Acquisition Parameters  
 Date\_ 20060810  
 Time 11.59  
 INSTRUM spect  
 PROBHD 5 mm QNP 1H/13  
 PULPROG zgpg30  
 TD 65536  
 SOLVENT CDCl3  
 NS 300  
 DS 4  
 SWH 23980.814 Hz  
 FIDRES 0.365918 Hz  
 AQ 1.3664756 sec  
 RG 3251  
 DW 20.850 usec  
 DE 6.00 usec  
 TE 296.2 K  
 D1 2.0000000 sec  
 d11 0.0300000 sec  
 DELTA 1.89999998 sec  
 TDO 1

==== CHANNEL f1 =====  
 NUC1 13C  
 P1 12.50 usec  
 PL1 0.00 dB  
 SFO1 100.6228298 MHz

==== CHANNEL f2 =====  
 CPDPRG2 waltz16  
 NUC2 1H  
 PCPD2 80.00 usec  
 PL2 0.00 dB  
 PL12 16.30 dB  
 PL13 16.30 dB  
 SFO2 400.1316005 MHz

F2 - Processing parameters  
 SI 32768  
 SF 100.6125323 MHz  
 WDW EM  
 SSB 0  
 LB 1.00 Hz  
 GB 0  
 PC 1.40

Table 1, Cmpd. 8c

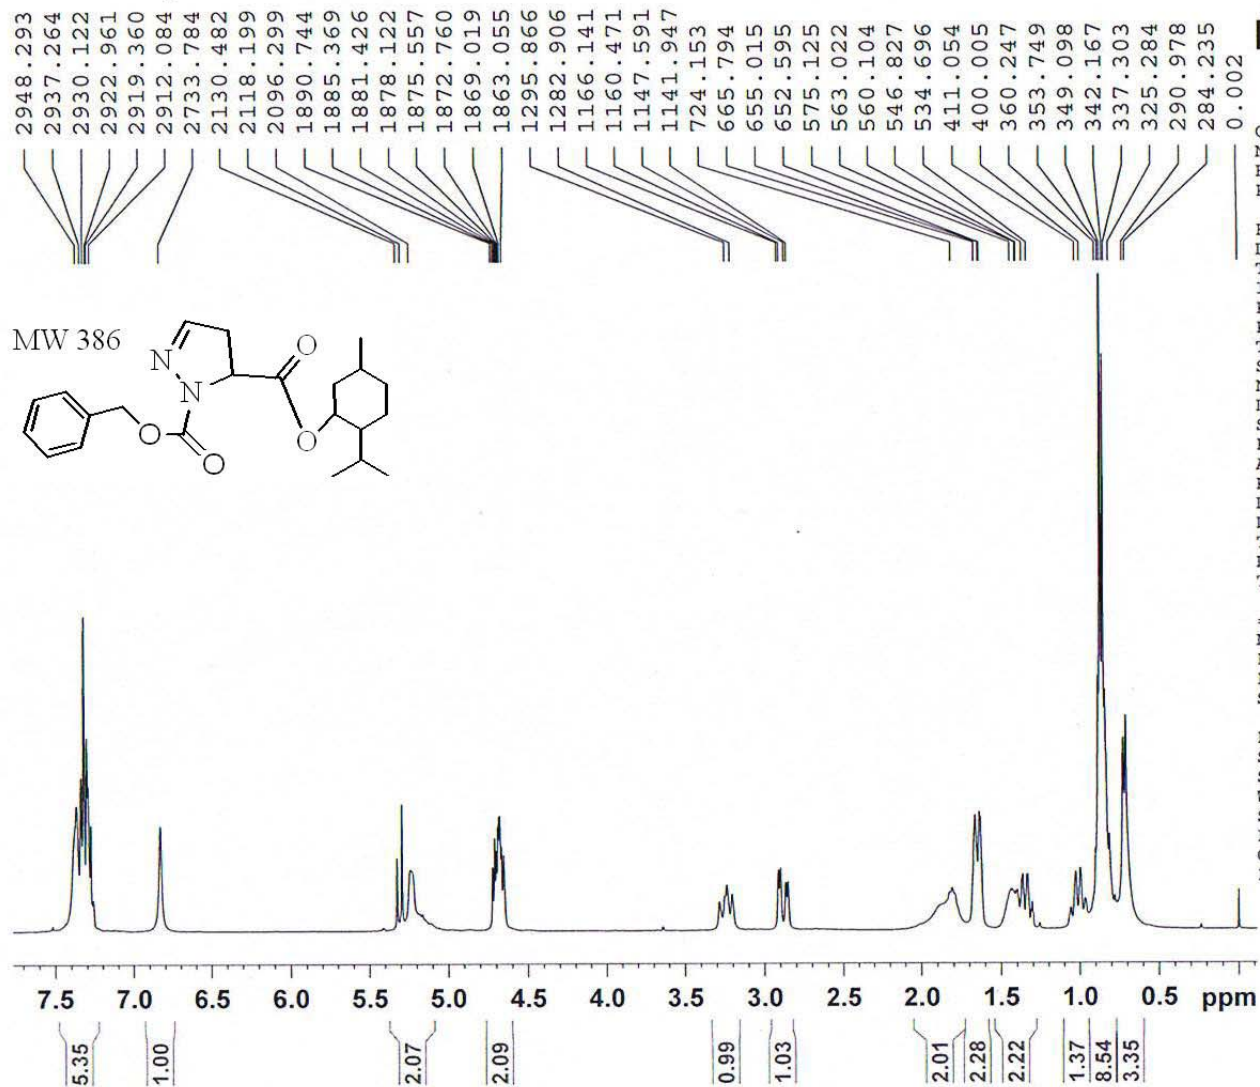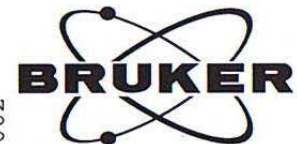

Current Data Parameters  
 NAME 400-Aug10-2006  
 EXPNO 20  
 PROCNO 1

F2 - Acquisition Parameters  
 Date\_ 20060810  
 Time 10.56  
 INSTRUM spect  
 PROBHD 5 mm QNP 1H/13  
 PULPROG zg30  
 TD 65536  
 SOLVENT CDCl3  
 NS 8  
 DS 2  
 SWH 8278.146 Hz  
 FIDRES 0.126314 Hz  
 AQ 3.9584243 sec  
 RG 18  
 DW 60.400 usec  
 DE 6.00 usec  
 TE 296.2 K  
 D1 1.00000000 sec  
 TDO 1

==== CHANNEL f1 =====  
 NUC1 1H  
 P1 12.25 usec  
 PL1 0.00 dB  
 SFO1 400.1324710 MHz

F2 - Processing parameters  
 SI 32768  
 SF 400.1299840 MHz  
 WDW EM  
 SSB 0  
 LB 0.30 Hz  
 GB 0  
 PC 1.00



Table 1, Cmpd. 8c

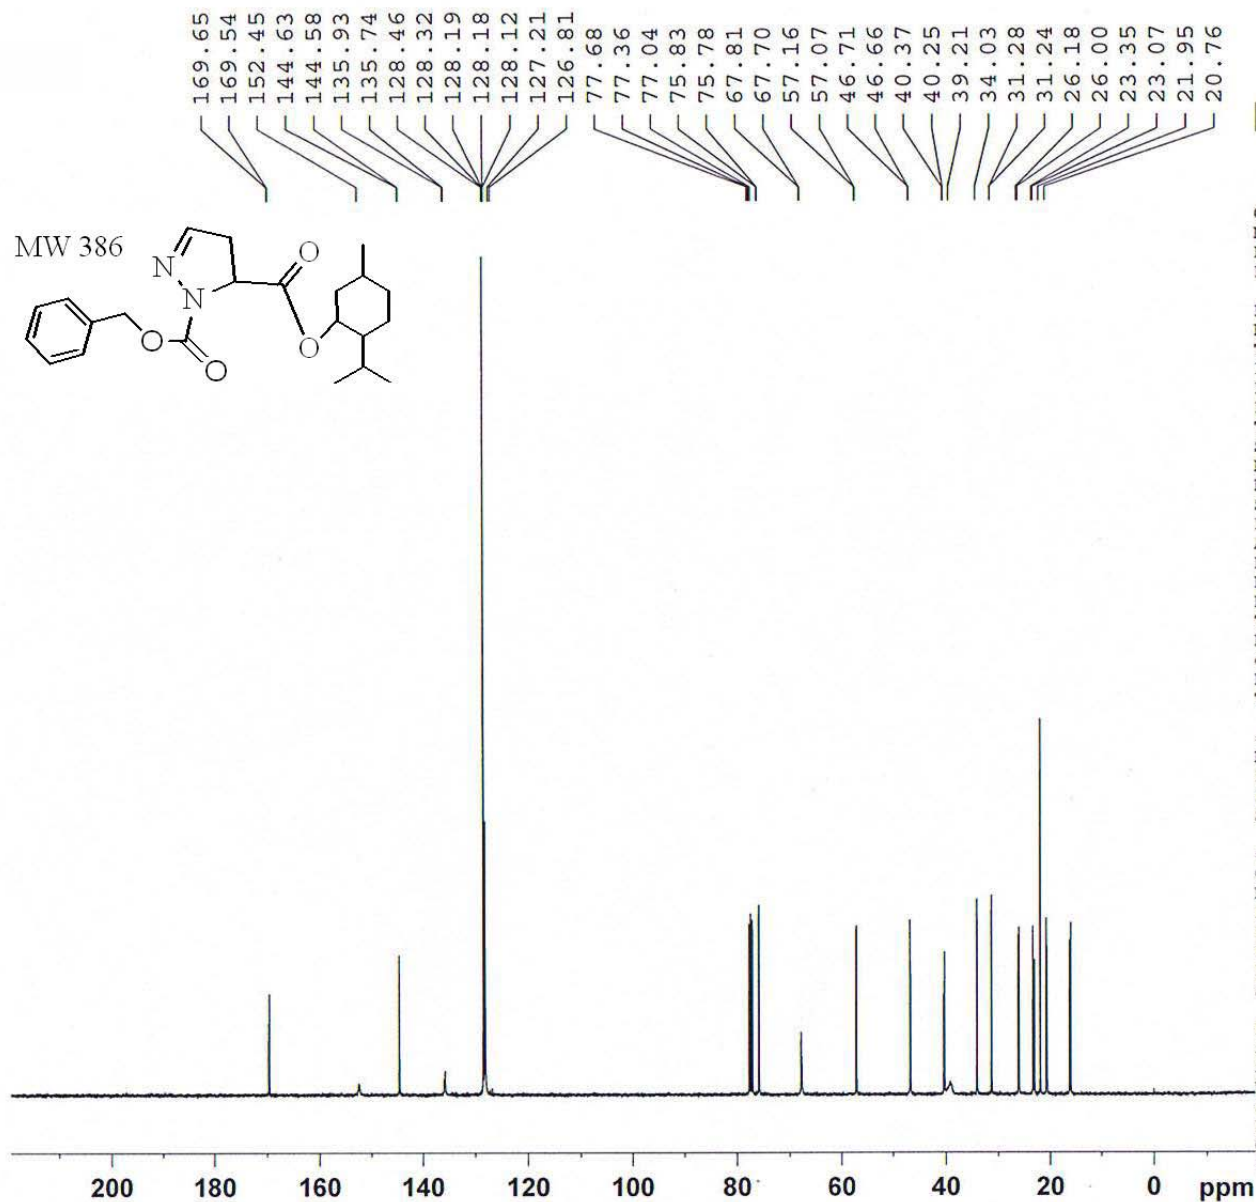

MW 386

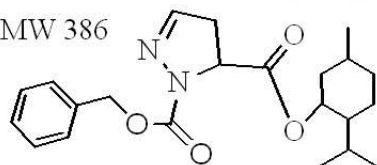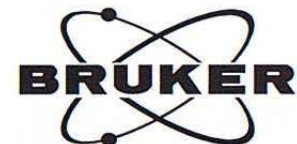

Current Data Parameters  
 NAME 400-Aug10-2006  
 EXPNO 21  
 PROCNO 1

F2 - Acquisition Parameters  
 Date\_ 20060810  
 Time 11.02  
 INSTRUM spect  
 PROBHD 5 mm QNP 1H/13  
 PULPROG zgpg30  
 TD 65536  
 SOLVENT CDCl3  
 NS 280  
 DS 4  
 SWH 23980.814 Hz  
 FIDRES 0.365918 Hz  
 AQ 1.3664756 sec  
 RG 1149.4  
 DW 20.850 usec  
 DE 6.00 usec  
 TE 296.2 K  
 D1 2.00000000 sec  
 d11 0.03000000 sec  
 DELTA 1.89999998 sec  
 TDO 1

==== CHANNEL f1 =====  
 NUC1 13C  
 P1 12.50 usec  
 PL1 0.00 dB  
 SFO1 100.6228298 MHz

==== CHANNEL f2 =====  
 CPDPRG2 waltz16  
 NUC2 1H  
 PCPD2 80.00 usec  
 PL2 0.00 dB  
 PL12 16.30 dB  
 PL13 16.30 dB  
 SFO2 400.1316005 MHz

F2 - Processing parameters  
 SI 32768  
 SF 100.6127690 MHz  
 WDW EM  
 SSB 0  
 LB 1.00 Hz  
 GB 0  
 PC 1.40

Table 1, Cmpd. 9a

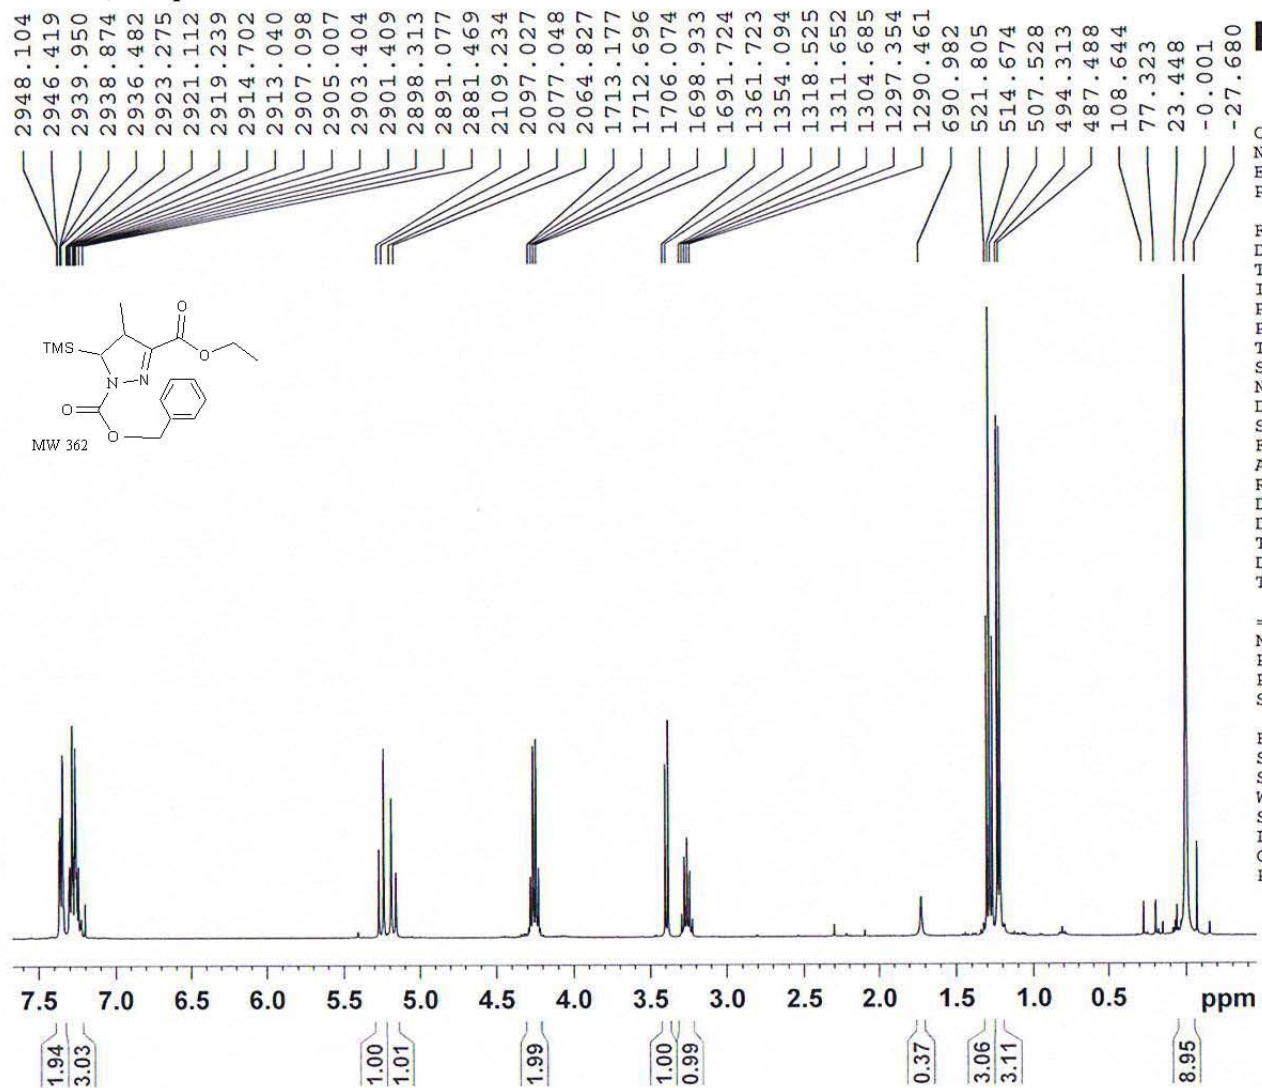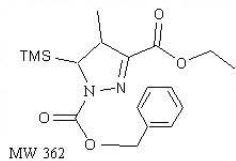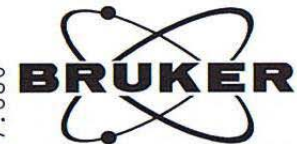

Current Data Parameters  
 NAME 400-Aug08-2006  
 EXPNO 10  
 PROCNO 1

F2 - Acquisition Parameters  
 Date\_ 20060808  
 Time 13.56  
 INSTRUM spect  
 PROBHD 5 mm QNP 1H/13  
 PULPROG zg30  
 TD 65536  
 SOLVENT CDCl3  
 NS 8  
 DS 2  
 SWH 8278.146 Hz  
 FIDRES 0.126314 Hz  
 AQ 3.9584243 sec  
 RG 71.8  
 DW 60.400 usec  
 DE 6.00 usec  
 TE 296.2 K  
 D1 1.00000000 sec  
 TD0 1

==== CHANNEL f1 =====  
 NUC1 1H  
 P1 12.25 usec  
 PL1 0.00 dB  
 SFO1 400.1324710 MHz

F2 - Processing parameters  
 SI 32768  
 SF 400.1300327 MHz  
 WDW EM  
 SSB 0  
 LB 0.30 Hz  
 GB 0  
 PC 1.00

Table 1, Cmpd. 9a

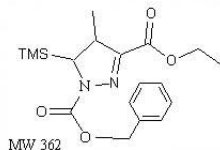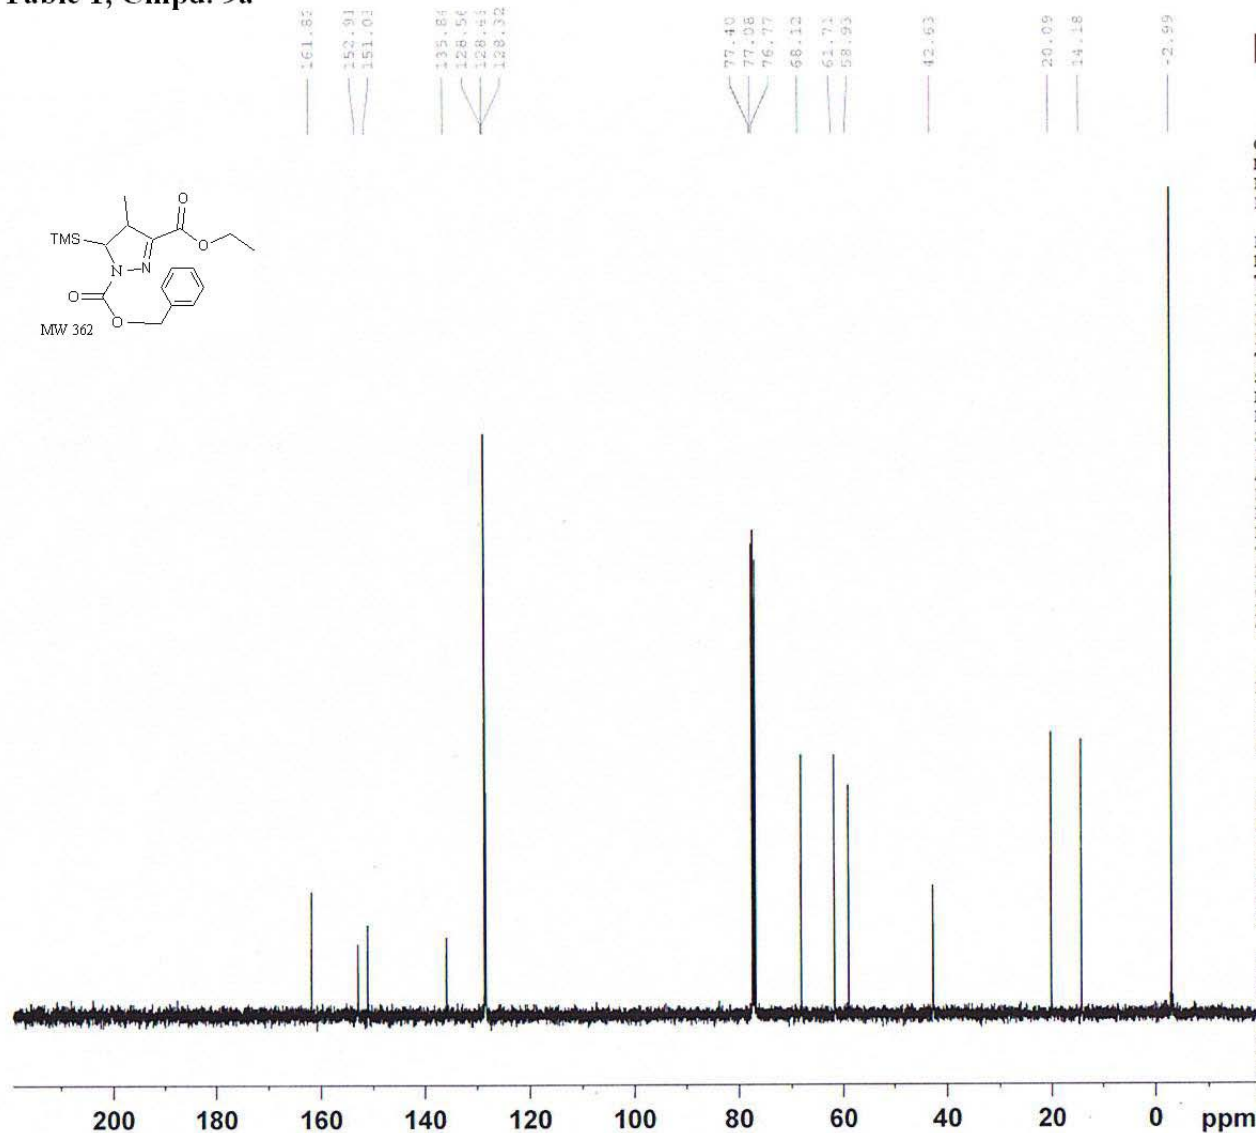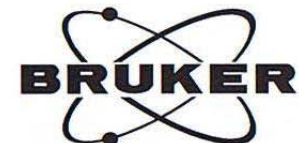

Current Data Parameters  
 NAME 400-Aug08-2006  
 EXPNO 11  
 PROCNO 1

F2 - Acquisition Parameters  
 Date\_ 20060808  
 Time\_ 14.00  
 INSTRUM spect  
 PROBHD 5 mm QNP 1H/13  
 PULPROG zgpg30  
 TD 65536  
 SOLVENT CDCl3  
 NS 100  
 DS 4  
 SWH 23980.814 Hz  
 FIDRES 0.365918 Hz  
 AQ 1.3664756 sec  
 RG 2298.8  
 DW 20.850 usec  
 DE 6.00 usec  
 TE 296.2 K  
 D1 2.00000000 sec  
 d11 0.03000000 sec  
 DELTA 1.89999998 sec  
 TDO 1

==== CHANNEL f1 =====  
 NUC1 13C  
 P1 12.50 usec  
 PL1 0.00 dB  
 SFO1 100.6228298 MHz

==== CHANNEL f2 =====  
 CPDPRG2 waltz16  
 NUC2 1H  
 PCPD2 80.00 usec  
 PL2 0.00 dB  
 PL12 16.30 dB  
 PL13 16.30 dB  
 SFO2 400.1316005 MHz

F2 - Processing parameters  
 SI 32768  
 SF 100.6127690 MHz  
 WDW EM  
 SSB 0  
 LB 1.00 Hz  
 GB 0  
 PC 1.40

Table 1, Cmpd. 9b

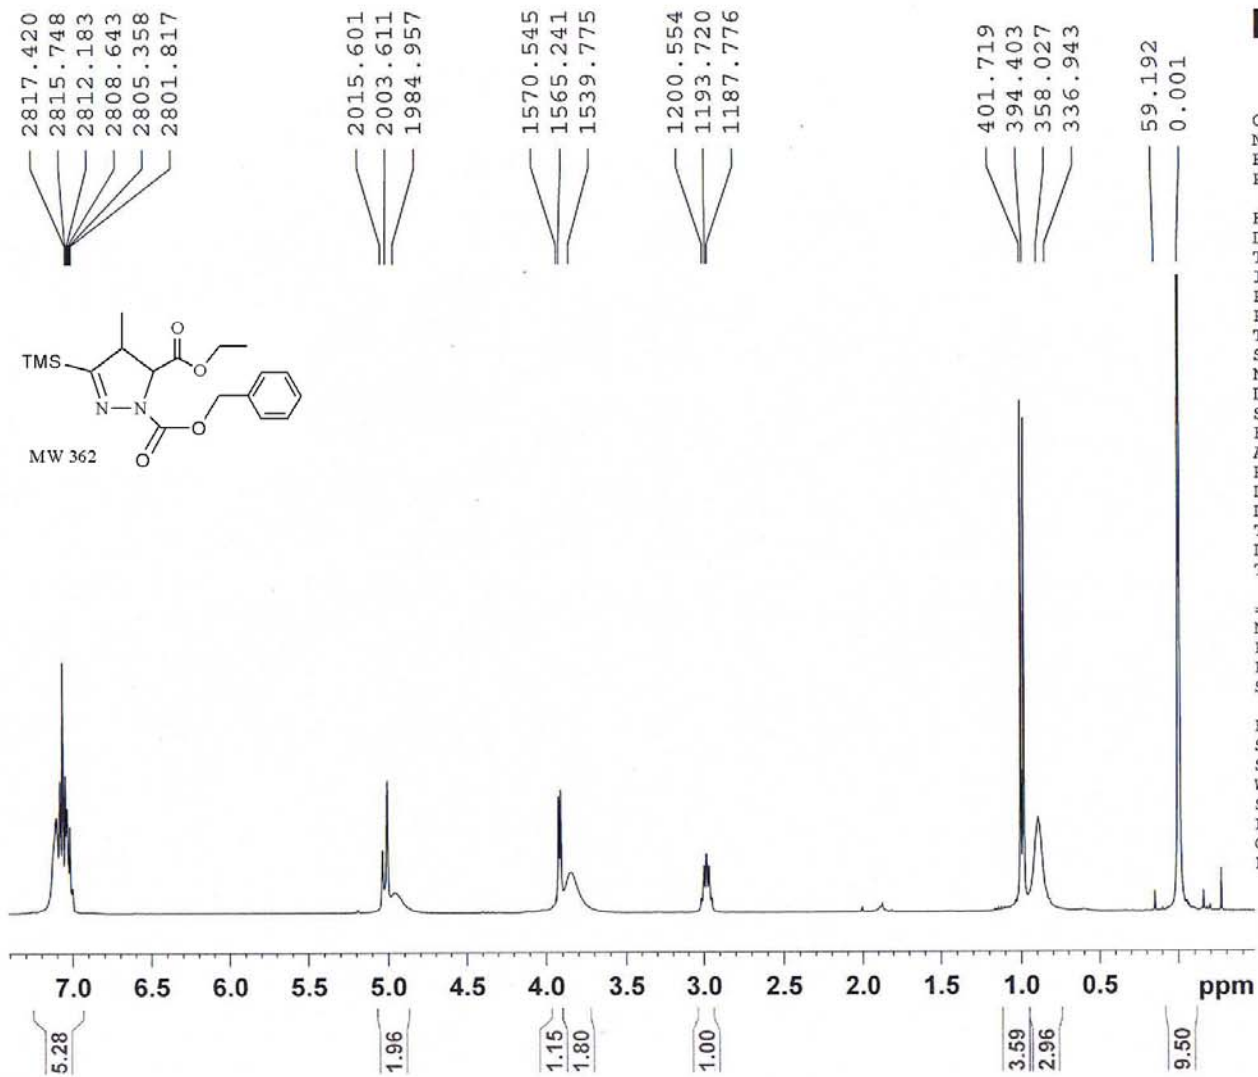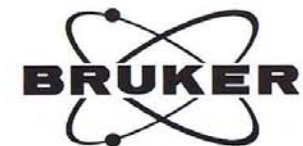

Current Data Parameters  
 NAME 400-Aug14-2006  
 EXPNO 50  
 PROCNO 1

F2 - Acquisition Parameters  
 Date\_ 20060814  
 Time\_ 12.37  
 INSTRUM spect  
 PROBHD 5 mm QNP 1H/13  
 PULPROG zg30  
 TD 65536  
 SOLVENT CDCl3  
 NS 8  
 DS 2  
 SWH 8278.146 Hz  
 FIDRES 0.126314 Hz  
 AQ 3.9584243 sec  
 RG 22.6  
 DW 60.400 usec  
 DE 6.00 usec  
 TE 296.2 K  
 D1 1.00000000 sec  
 TDO 1

===== CHANNEL f1 =====  
 NUC1 1H  
 P1 12.25 usec  
 PL1 0.00 dB  
 SFO1 400.1324710 MHz

F2 - Processing parameters  
 SI 32768  
 SF 400.1300964 MHz  
 WDW EM  
 SSB 0  
 LB 0.30 Hz  
 GB 0  
 PC 1.00

Table 1, Cmpd. 9b

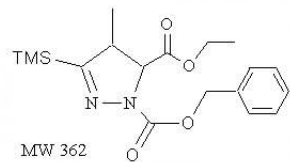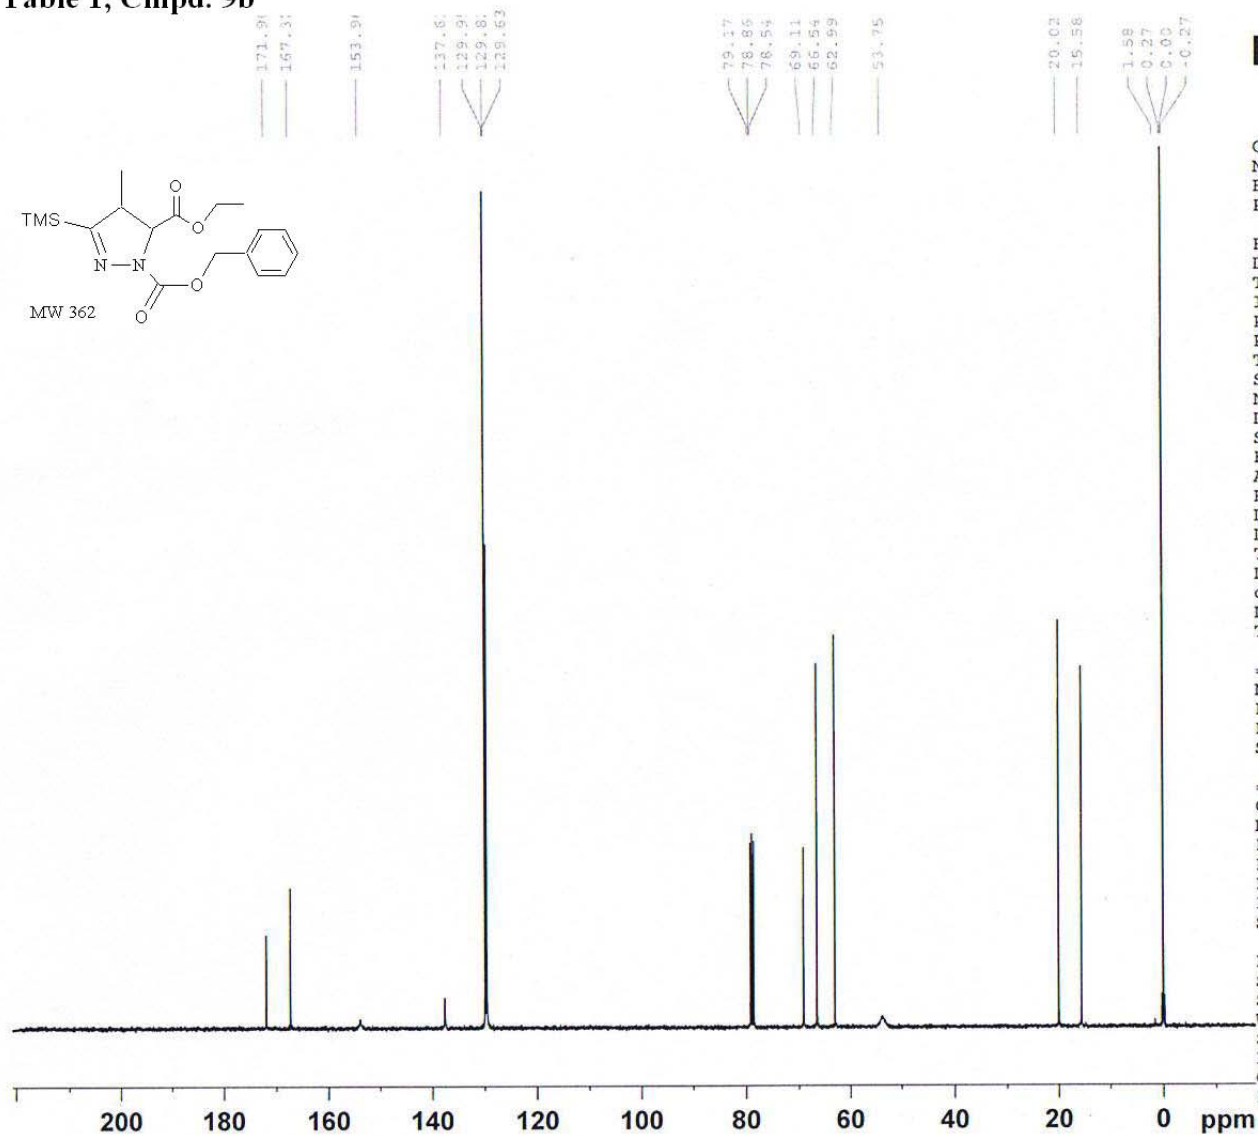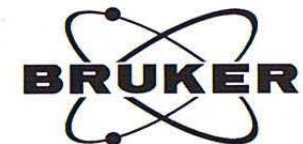

Current Data Parameters  
 NAME 400-Aug14-2006  
 EXPNO 52  
 PROCNO 1

F2 - Acquisition Parameters  
 Date\_ 20060814  
 Time 12.57  
 INSTRUM spect  
 PROBHD 5 mm QNP 1H/13  
 PULPROG zgpg30  
 TD 65536  
 SOLVENT CDC13  
 NS 200  
 DS 4  
 SWH 23980.814 Hz  
 FIDRES 0.365918 Hz  
 AQ 1.3664756 sec  
 RG 4597.6  
 DW 20.850 usec  
 DE 6.00 usec  
 TE 296.2 K  
 D1 2.00000000 sec  
 d11 0.03000000 sec  
 DELTA 1.89999998 sec  
 TDO 1

==== CHANNEL f1 =====  
 NUC1 13C  
 P1 12.50 usec  
 PL1 0.00 dB  
 SFO1 100.6228298 MHz

==== CHANNEL f2 =====  
 CPDPRG2 waltz16  
 NUC2 1H  
 PCPD2 80.00 usec  
 PL2 0.00 dB  
 PL12 16.30 dB  
 PL13 16.30 dB  
 SFO2 400.1316005 MHz

F2 - Processing parameters  
 SI 32768  
 SF 100.6126119 MHz  
 WDW EM  
 SSB 0  
 LB 1.00 Hz  
 GB 0  
 PC 1.40

**Table 1, Cmpd. 9c**

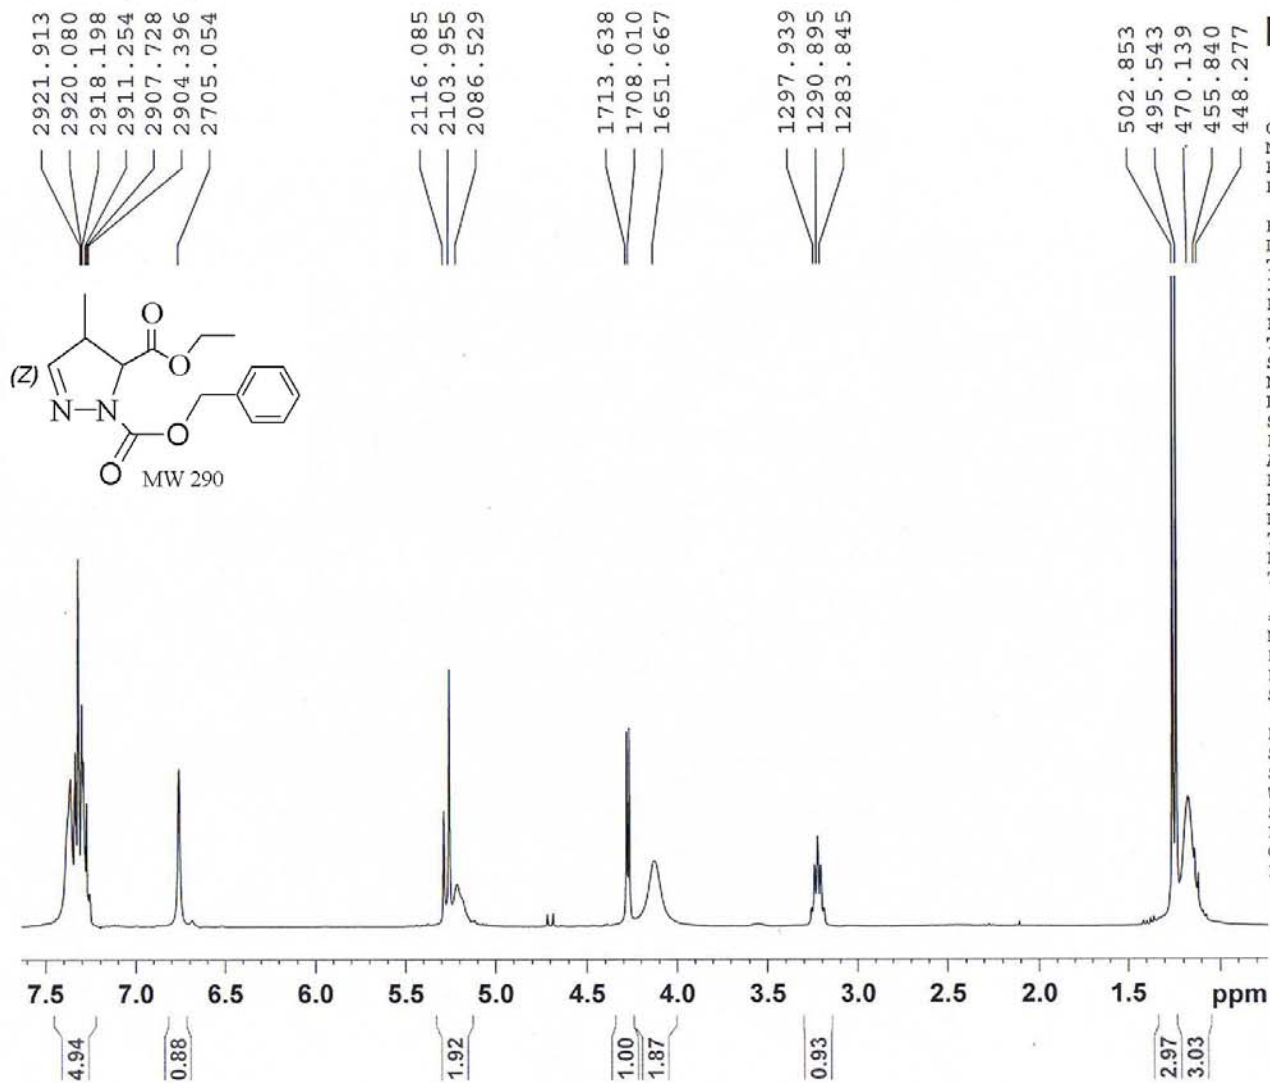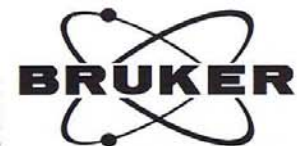

Current Data Parameters  
 NAME 400-Aug09-2006  
 EXPNO 10  
 PROCNO 1

F2 - Acquisition Parameters  
 Date\_ 20060809  
 Time\_ 15.14  
 INSTRUM spect  
 PROBHD 5 mm QNP 1H/13  
 PULPROG zg30  
 TD 65536  
 SOLVENT CDCl3  
 NS 8  
 DS 2  
 SWH 8278.146 Hz  
 FIDRES 0.126314 Hz  
 AQ 3.9584243 sec  
 RG 18  
 DW 60.400 usec  
 DE 6.00 usec  
 TE 296.2 K  
 D1 1.00000000 sec  
 TDO 1

==== CHANNEL f1 =====  
 NUC1 1H  
 P1 12.25 usec  
 PL1 0.00 dB  
 SFO1 400.1324710 MHz

F2 - Processing parameters  
 SI 32768  
 SF 400.1299674 MHz  
 WDW EM  
 SSB 0  
 LB 0.30 Hz  
 GB 0  
 PC 1.00

Table 1, Cmpd. 9c

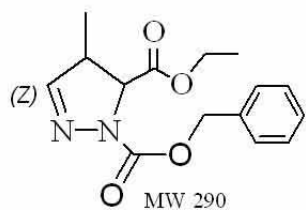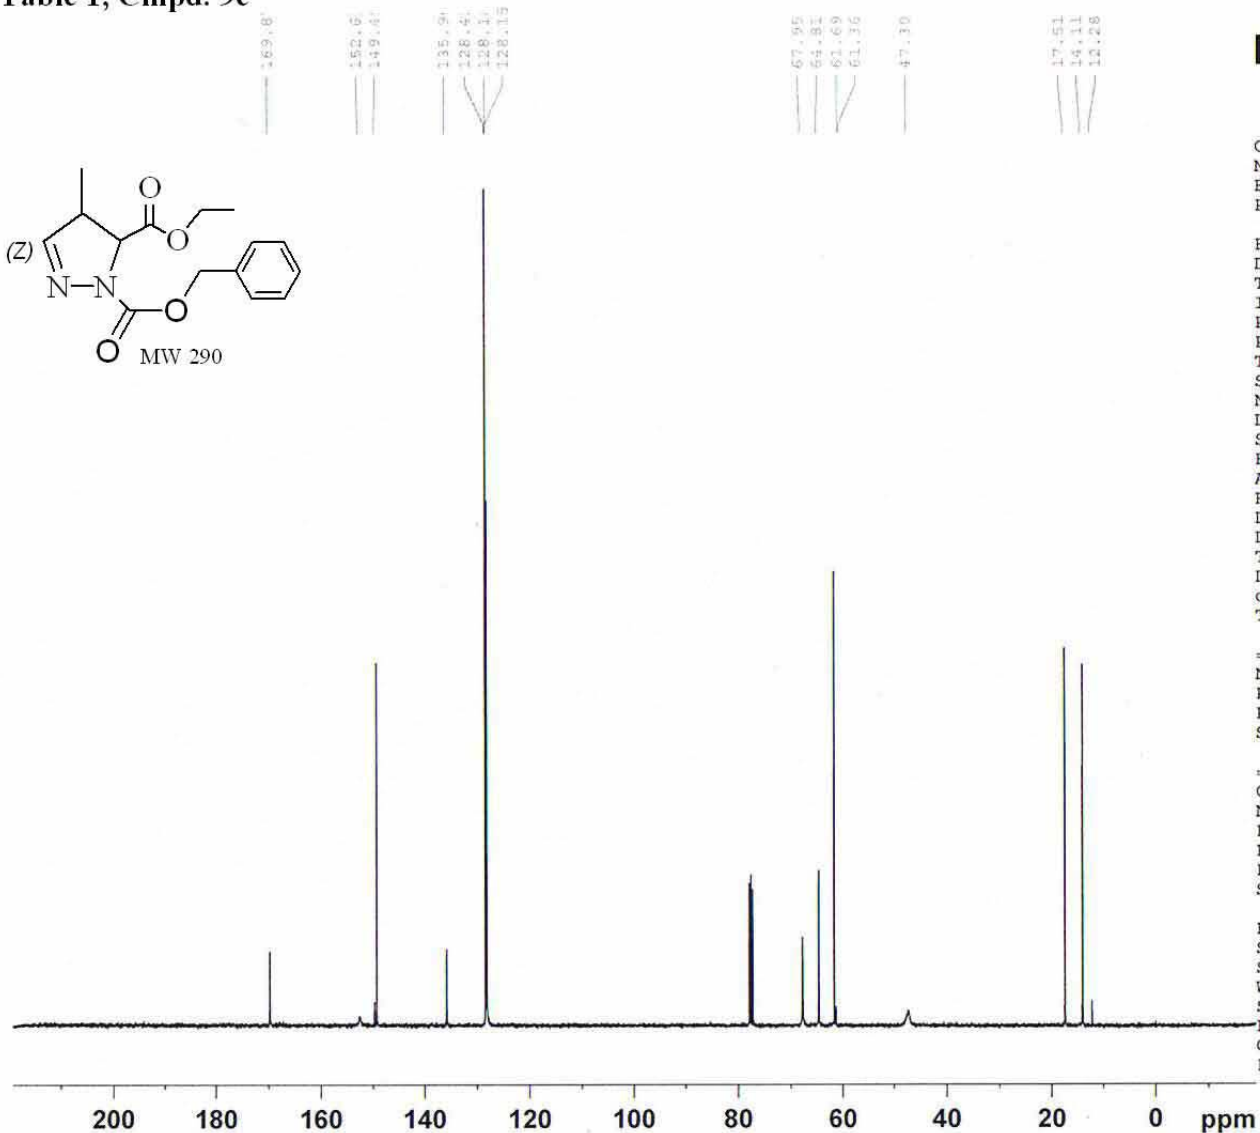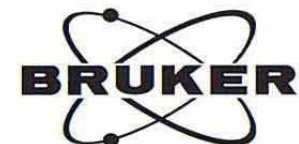

Current Data Parameters  
 NAME 400-Aug09-2006  
 EXPNO 11  
 PROCNO 1

F2 - Acquisition Parameters  
 Date\_ 20060809  
 Time\_ 15.17  
 INSTRUM spect  
 PROBHD 5 mm QNP 1H/13  
 PULPROG zgpg30  
 TD 65536  
 SOLVENT CDCl3  
 NS 101  
 DS 4  
 SWH 23980.814 Hz  
 FIDRES 0.365918 Hz  
 AQ 1.3664756 sec  
 RG 1290.2  
 DW 20.850 usec  
 DE 6.00 usec  
 TE 296.2 K  
 D1 2.00000000 sec  
 d11 0.03000000 sec  
 TD0 1

==== CHANNEL f1 =====  
 NUC1 13C  
 P1 12.50 usec  
 PL1 0.00 dB  
 SFO1 100.6228298 MHz

==== CHANNEL f2 =====  
 CPDPRG2 waltz16  
 NUC2 1H  
 PCPD2 80.00 usec  
 PL2 0.00 dB  
 PL12 16.30 dB  
 SFO2 400.1316005 MHz

F2 - Processing parameters  
 SI 32768  
 SF 100.6127690 MHz  
 WDW EM  
 SSB 0  
 LB 1.00 Hz  
 GB 0  
 PC 1.40

Table 1, Cmpd. 10b

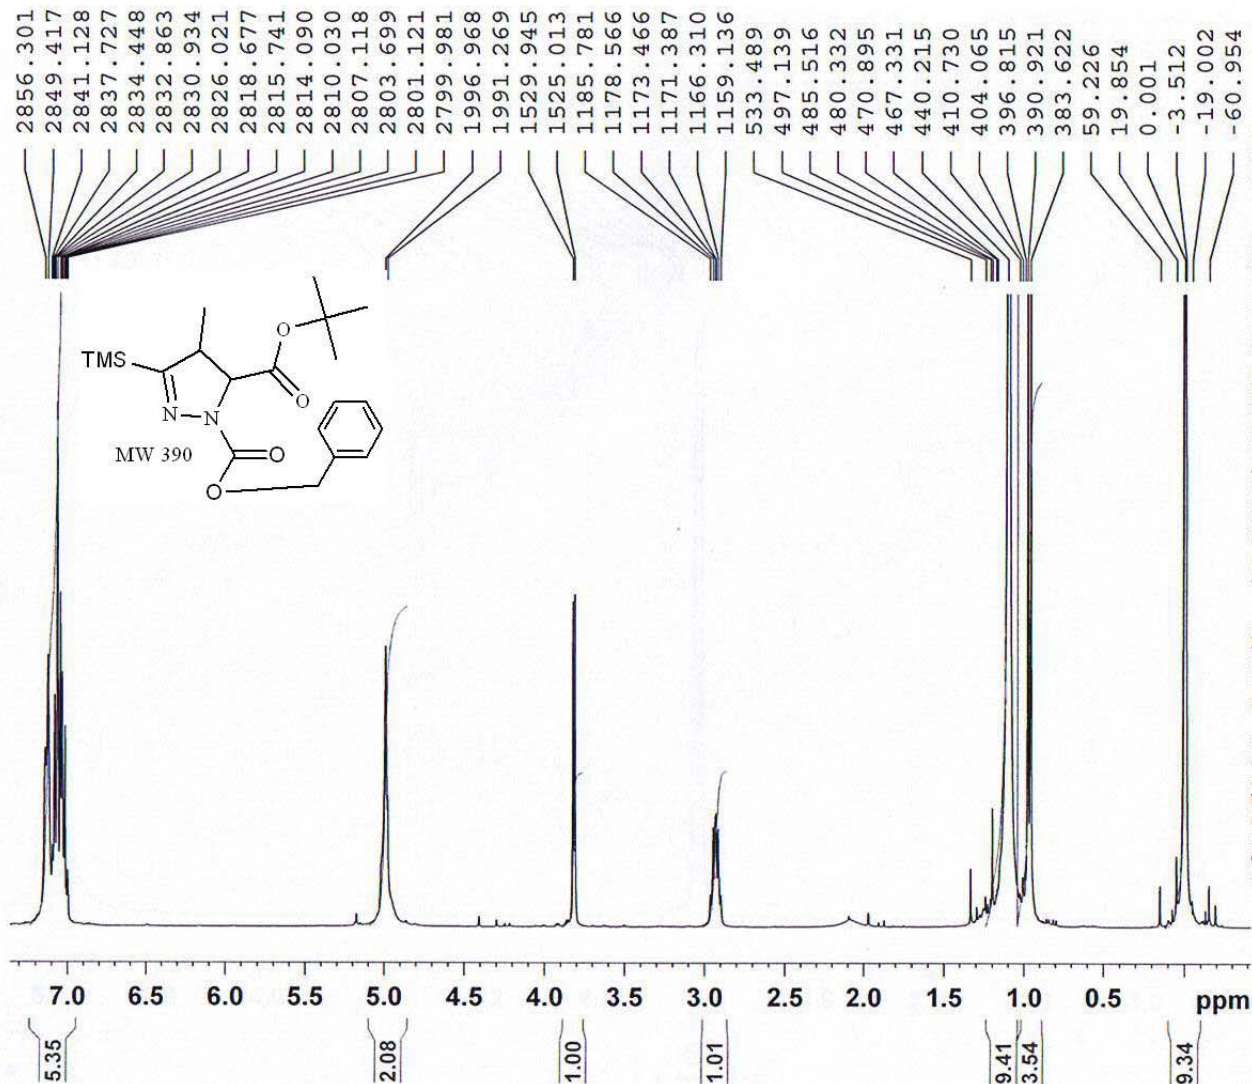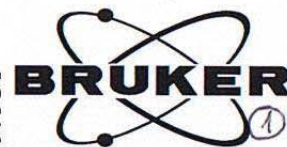

Current Data Parameters  
 NAME 400-Aug18-2005  
 EXPNO 20  
 PROCNO 1

F2 - Acquisition Parameters  
 Date 20050818  
 Time 13.14  
 INSTRUM spect  
 PROBHD 5 mm QNP 1H/13  
 PULPROG zg30  
 TD 65536  
 SOLVENT CDCl3  
 NS 16  
 DS 2  
 SWH 8278.146 Hz  
 FIDRES 0.126314 Hz  
 AQ 3.9584243 sec  
 RG 18  
 DW 60.400 usec  
 DE 6.00 usec  
 TE 299.2 K  
 D1 1.00000000 sec  
 TDO 1

==== CHANNEL f1 =====  
 NUC1 1H  
 P1 12.25 usec  
 PL1 0.00 dB  
 SFO1 400.1324710 MHz

F2 - Processing parameters  
 SI 32768  
 SF 400.1300940 MHz  
 WDW EM  
 SSB 0  
 LB 0.30 Hz  
 GB 0  
 PC 1.00



Table 1, Cmpd. 10b

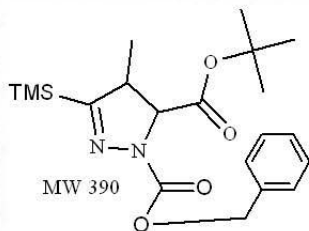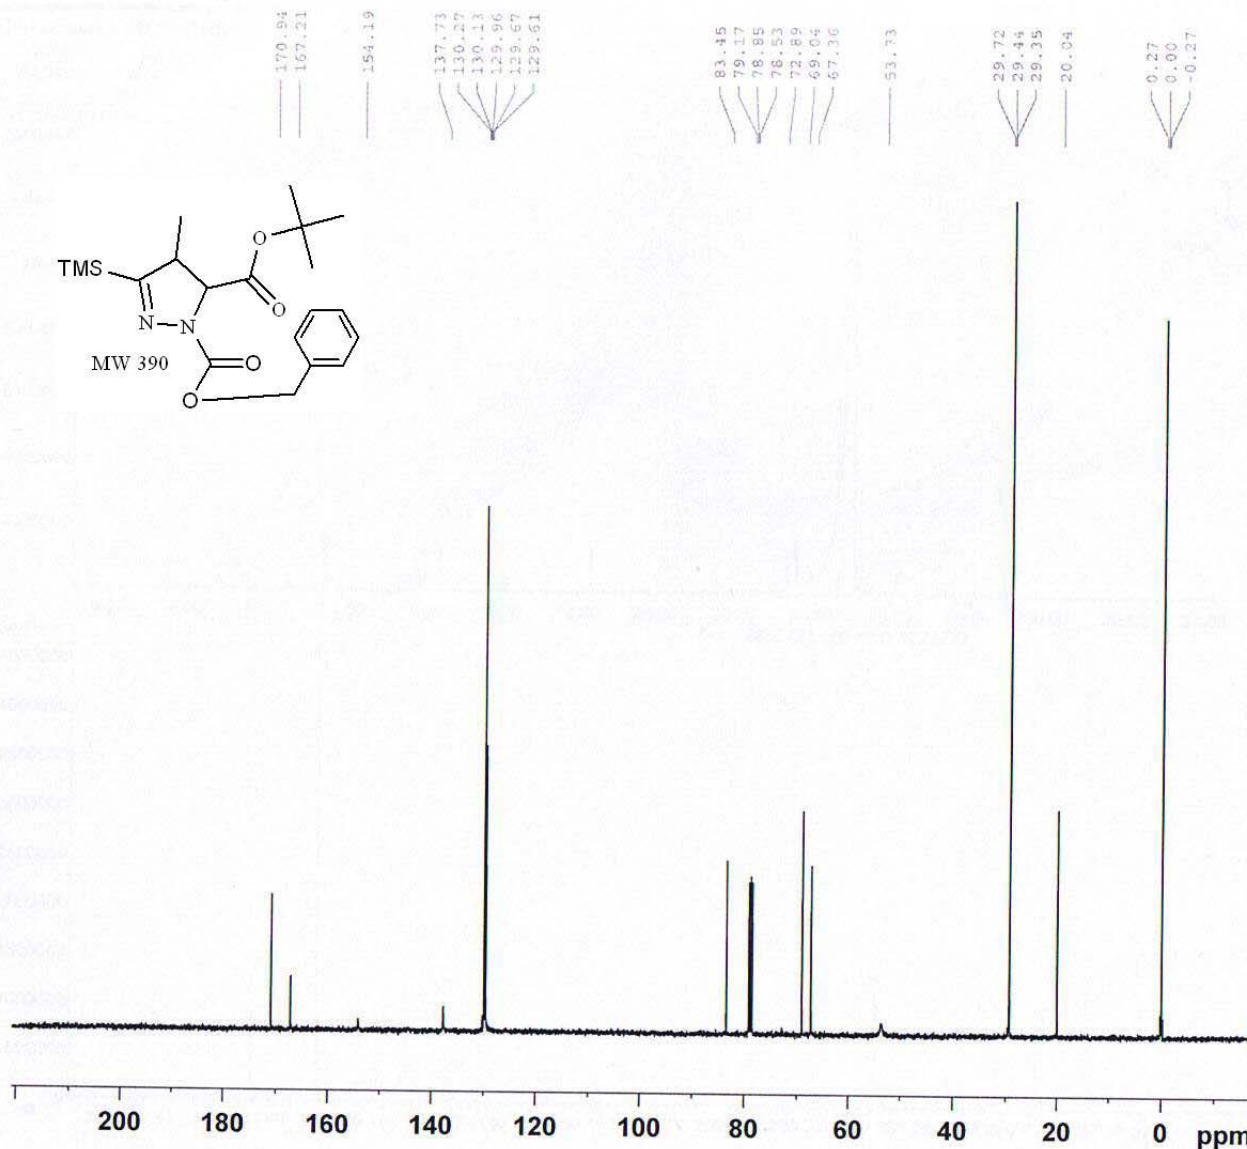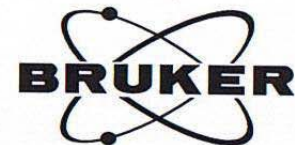

Current Data Parameters  
NAME 400-Aug18-2005  
EXPNO 21  
PROCNO 1

F2 - Acquisition Parameters  
Date\_ 20050818  
Time\_ 13.21  
INSTRUM spect  
PROBHD 5 mm QNP 1H/13  
PULPROG zgpg30  
TD 65536  
SOLVENT CDCl3  
NS 96  
DS 4  
SWH 23980.814 Hz  
FIDRES 0.365918 Hz  
AQ 1.3664756 sec  
RG 1625.5  
DW 20.850 usec  
DE 6.00 usec  
TE 300.2 K  
D1 2.00000000 sec  
d11 0.03000000 sec  
DELTA 1.89999998 sec  
TD0 1

==== CHANNEL f1 =====  
NUC1 13C  
P1 12.50 usec  
PL1 0.00 dB  
SFO1 100.6228298 MHz

==== CHANNEL f2 =====  
CPDPRG2 waltz16  
NUC2 1H  
PCPD2 80.00 usec  
PL2 0.00 dB  
PL12 16.30 dB  
PL13 16.30 dB  
SFO2 400.1316005 MHz

F2 - Processing parameters  
SI 32768  
SF 100.6126087 MHz  
WDW EM  
SSB 0  
LB 1.00 Hz  
GB 0  
PC 1.40

Table 1, Cmpd. 10c

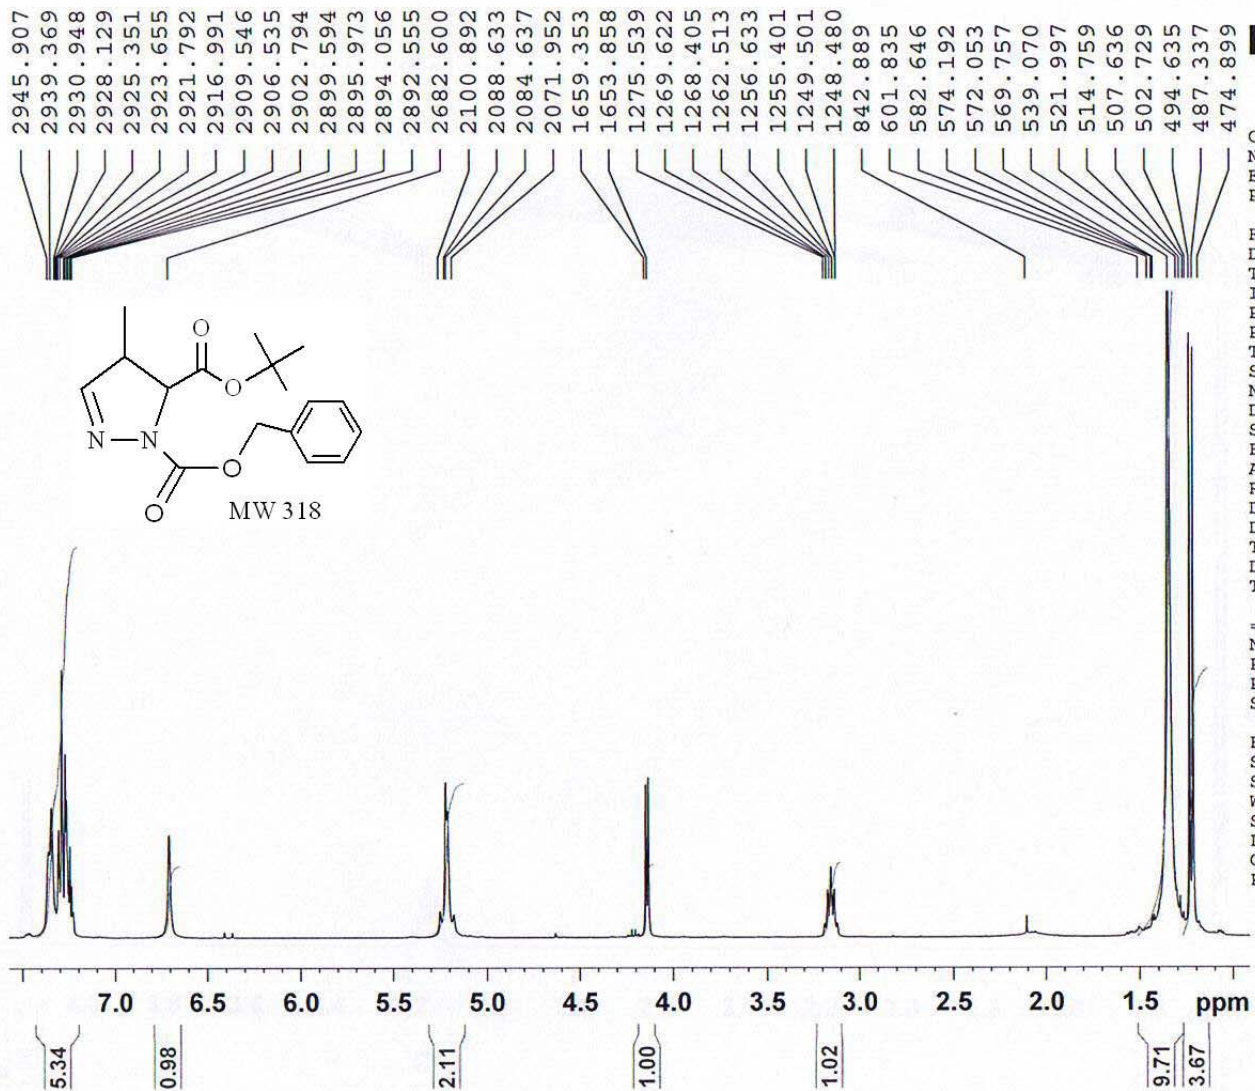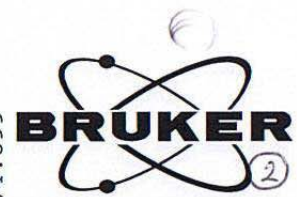

Current Data Parameters  
 NAME 400-Aug18-2005  
 EXPNO 30  
 PROCNO 1

F2 - Acquisition Parameters  
 Date\_ 20050818  
 Time\_ 13.29  
 INSTRUM spect  
 PROBHD 5 mm QNP 1H/13  
 PULPROG zg30  
 TD 65536  
 SOLVENT CDCl3  
 NS 16  
 DS 2  
 SWH 8278.146 Hz  
 FIDRES 0.126314 Hz  
 AQ 3.9584243 sec  
 RG 45.3  
 DW 60.400 usec  
 DE 6.00 usec  
 TE 299.2 K  
 D1 1.00000000 sec  
 TD0 1

==== CHANNEL f1 =====  
 NUC1 1H  
 P1 12.25 usec  
 PL1 0.00 dB  
 SFO1 400.1324710 MHz

F2 - Processing parameters  
 SI 32768  
 SF 400.1300180 MHz  
 WDW EM  
 SSB 0  
 LB 0.30 Hz  
 GB 0  
 PC 1.00

Table 1, Cmpd. 10c

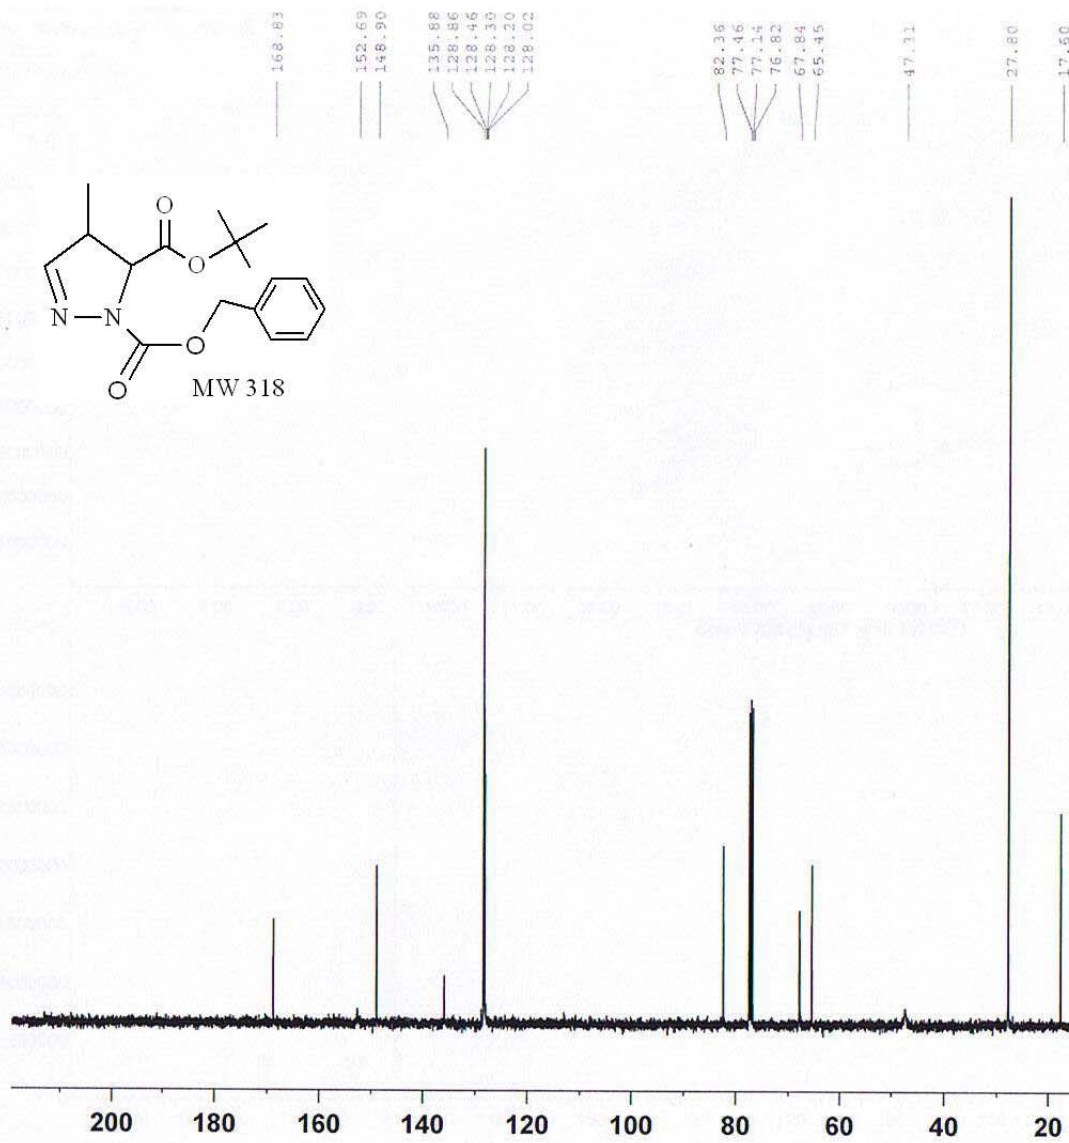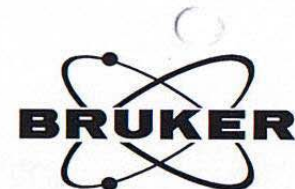

Current Data Parameters  
 NAME 400-Aug18-2005  
 EXPNO 31  
 PROCNO 1

F2 - Acquisition Parameters  
 Date\_ 20050818  
 Time\_ 13.36  
 INSTRUM spect  
 PROBHD 5 mm QNP 1H/13  
 PULPROG zgpg30  
 TD 65536  
 SOLVENT CDCl3  
 NS 96  
 DS 4  
 SWH 23980.814 Hz  
 FIDRES 0.365918 Hz  
 AQ 1.3664756 sec  
 RG 1024  
 DW 20.850 usec  
 DE 6.00 usec  
 TE 300.2 K  
 D1 2.00000000 sec  
 d11 0.03000000 sec  
 DELTA 1.89999998 sec  
 TD0 1

==== CHANNEL f1 =====  
 NUC1 13C  
 P1 12.50 usec  
 PL1 0.00 dB  
 SFO1 100.6228298 MHz

==== CHANNEL f2 =====  
 CPDPRG2 waltz16  
 NUC2 1H  
 PCPD2 80.00 usec  
 PL2 0.00 dB  
 PL12 16.30 dB  
 PL13 16.30 dB  
 SFO2 400.1316005 MHz

F2 - Processing parameters  
 SI 32768  
 SF 100.6127690 MHz  
 WDW EM  
 SSB 0  
 LB 1.00 Hz  
 GB 0  
 PC 1.40

**Table 1, Cmpd. 11b**

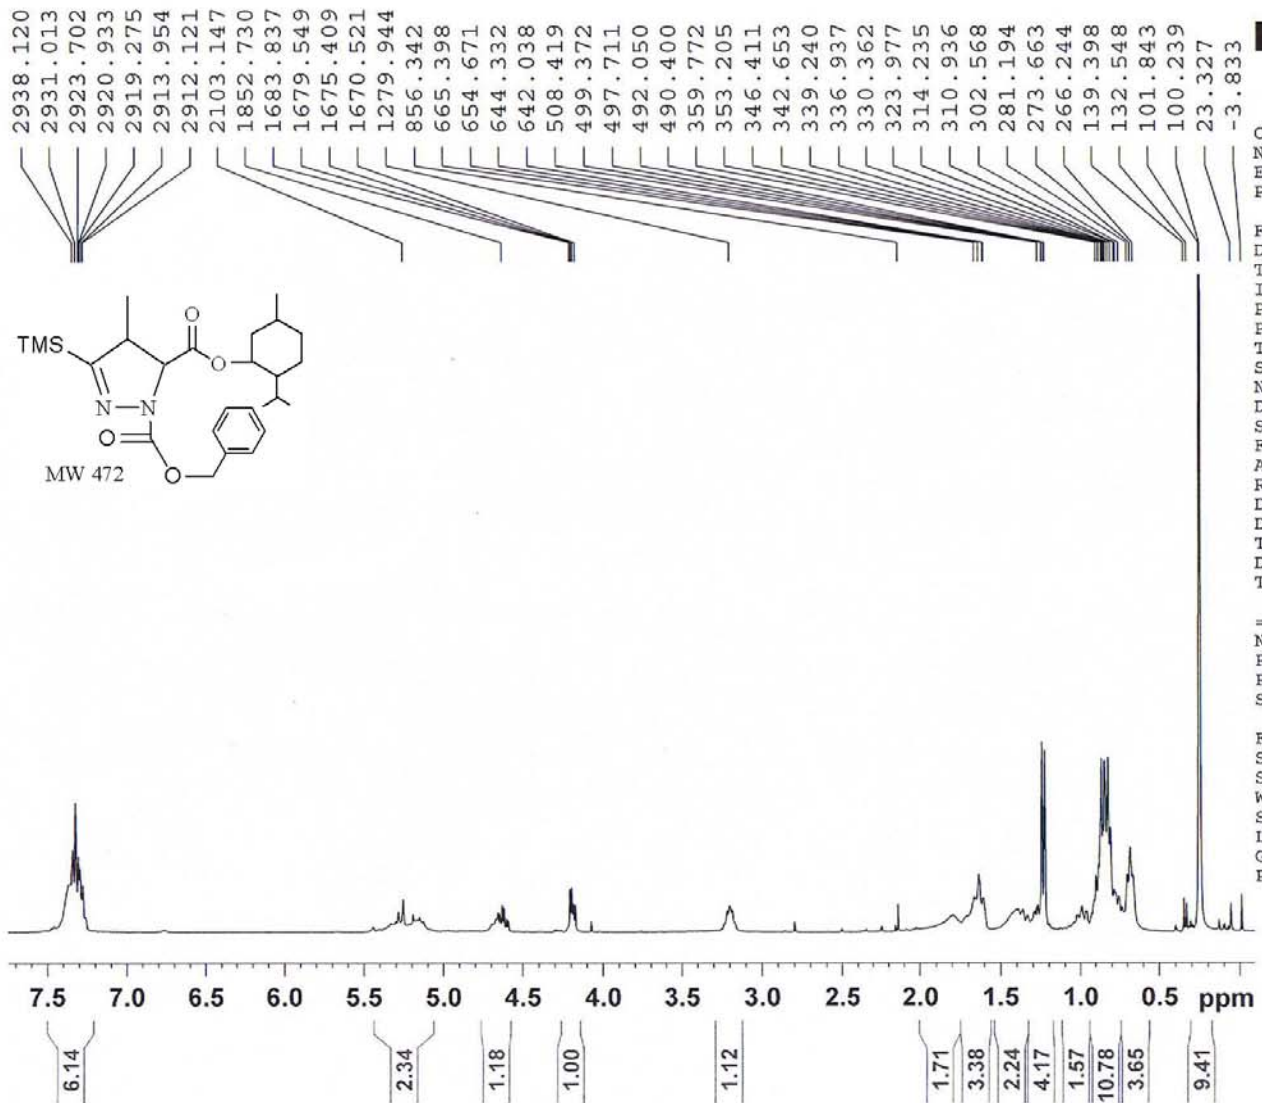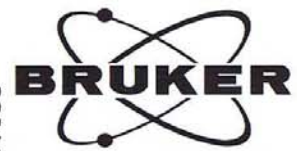

Current Data Parameters  
 NAME 400-Aug10-2006  
 EXPNO 30  
 PROCNO 1

F2 - Acquisition Parameters  
 Date 20060810  
 Time 11.21  
 INSTRUM spect  
 PROBHD 5 mm QNP 1H/13  
 PULPROG zg30  
 TD 65536  
 SOLVENT CDCl3  
 NS 8  
 DS 2  
 SWH 8278.146 Hz  
 FIDRES 0.126314 Hz  
 AQ 3.9584243 sec  
 RG 20.2  
 DW 60.400 usec  
 DE 6.00 usec  
 TE 296.2 K  
 D1 1.00000000 sec  
 TDO 1

==== CHANNEL f1 =====  
 NUC1 1H  
 P1 12.25 usec  
 PL1 0.00 dB  
 SFO1 400.1324710 MHz

F2 - Processing parameters  
 SI 32768  
 SF 400.1300000 MHz  
 WDW EM  
 SSB 0  
 LB 0.30 Hz  
 GB 0  
 PC 1.00

**Table 1, Cmpd. 11b**

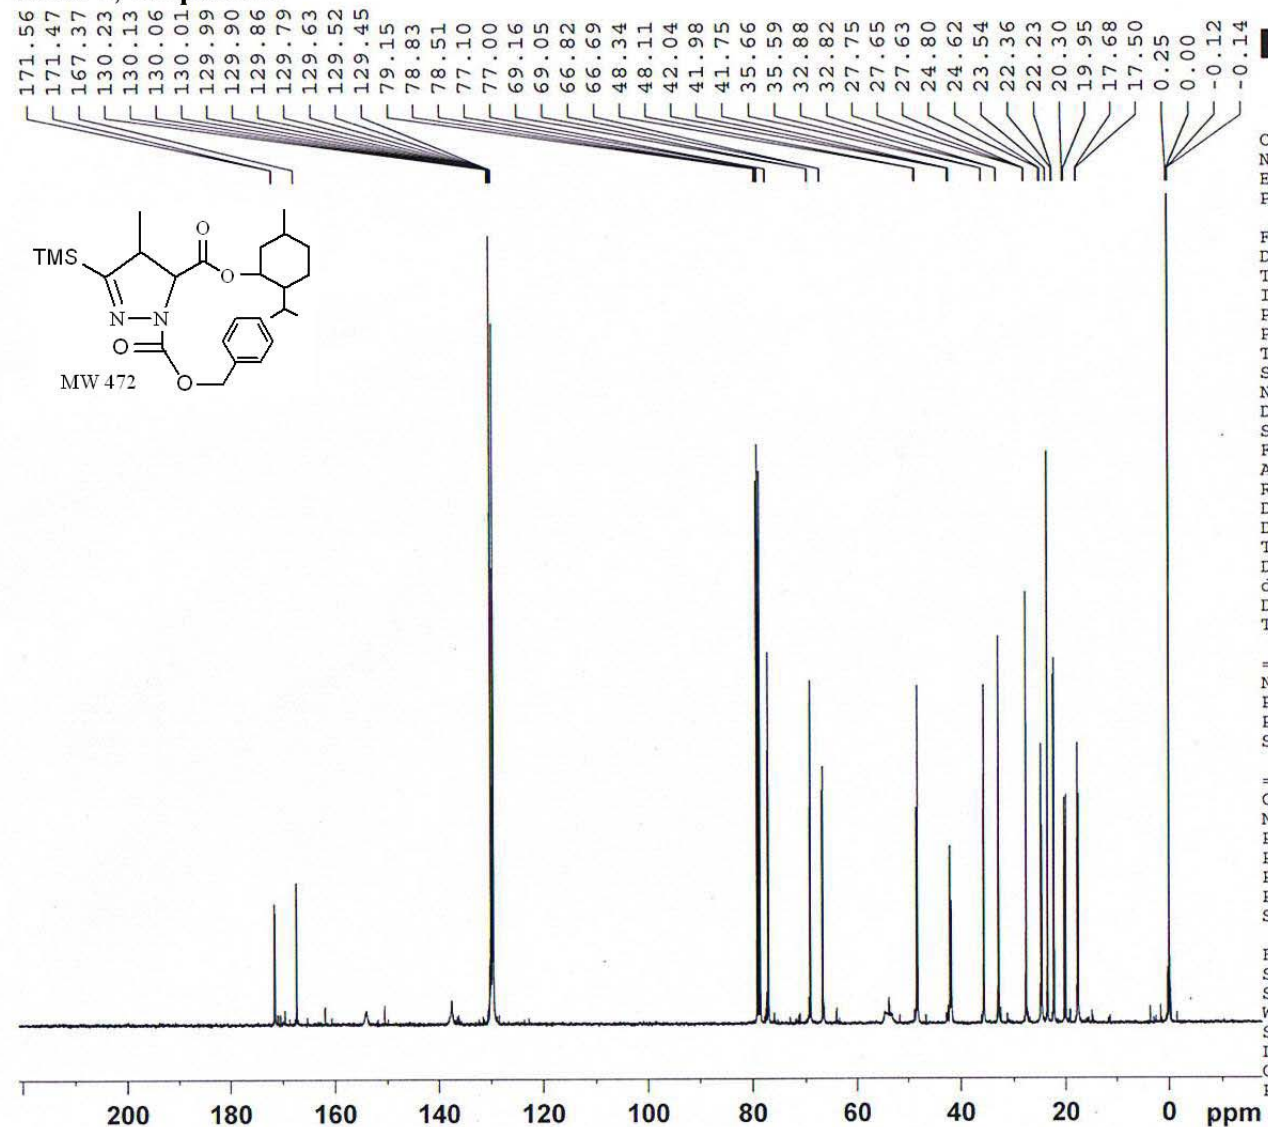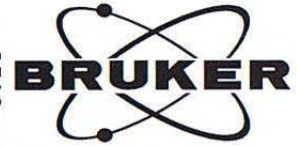

Current Data Parameters  
 NAME 400-Aug10-2006  
 EXPNO 50  
 PROCNO 1

F2 - Acquisition Parameters  
 Date\_ 20060810  
 Time\_ 20.52  
 INSTRUM spect  
 PROBHD 5 mm QNP 1H/13  
 PULPROG zgpg30  
 TD 65536  
 SOLVENT CDCl3  
 NS 2424  
 DS 4  
 SWH 23980.814 Hz  
 FIDRES 0.365918 Hz  
 AQ 1.3664756 sec  
 RG 1290.2  
 DW 20.850 usec  
 DE 6.00 usec  
 TE 296.2 K  
 D1 2.00000000 sec  
 d11 0.03000000 sec  
 DELTA 1.89999998 sec  
 TDO 1

==== CHANNEL f1 =====  
 NUC1 13C  
 P1 12.50 usec  
 PL1 0.00 dB  
 SFO1 100.6228298 MHz

==== CHANNEL f2 =====  
 CPDPRG2 waltz16  
 NUC2 1H  
 PCPD2 80.00 usec  
 PL2 0.00 dB  
 PL12 16.30 dB  
 PL13 16.30 dB  
 SFO2 400.1316005 MHz

F2 - Processing parameters  
 SI 32768  
 SF 100.6126096 MHz  
 WDW EM  
 SSB 0  
 LB 1.00 Hz  
 GB 0  
 PC 1.40

Table 1, Cmpd. 11c

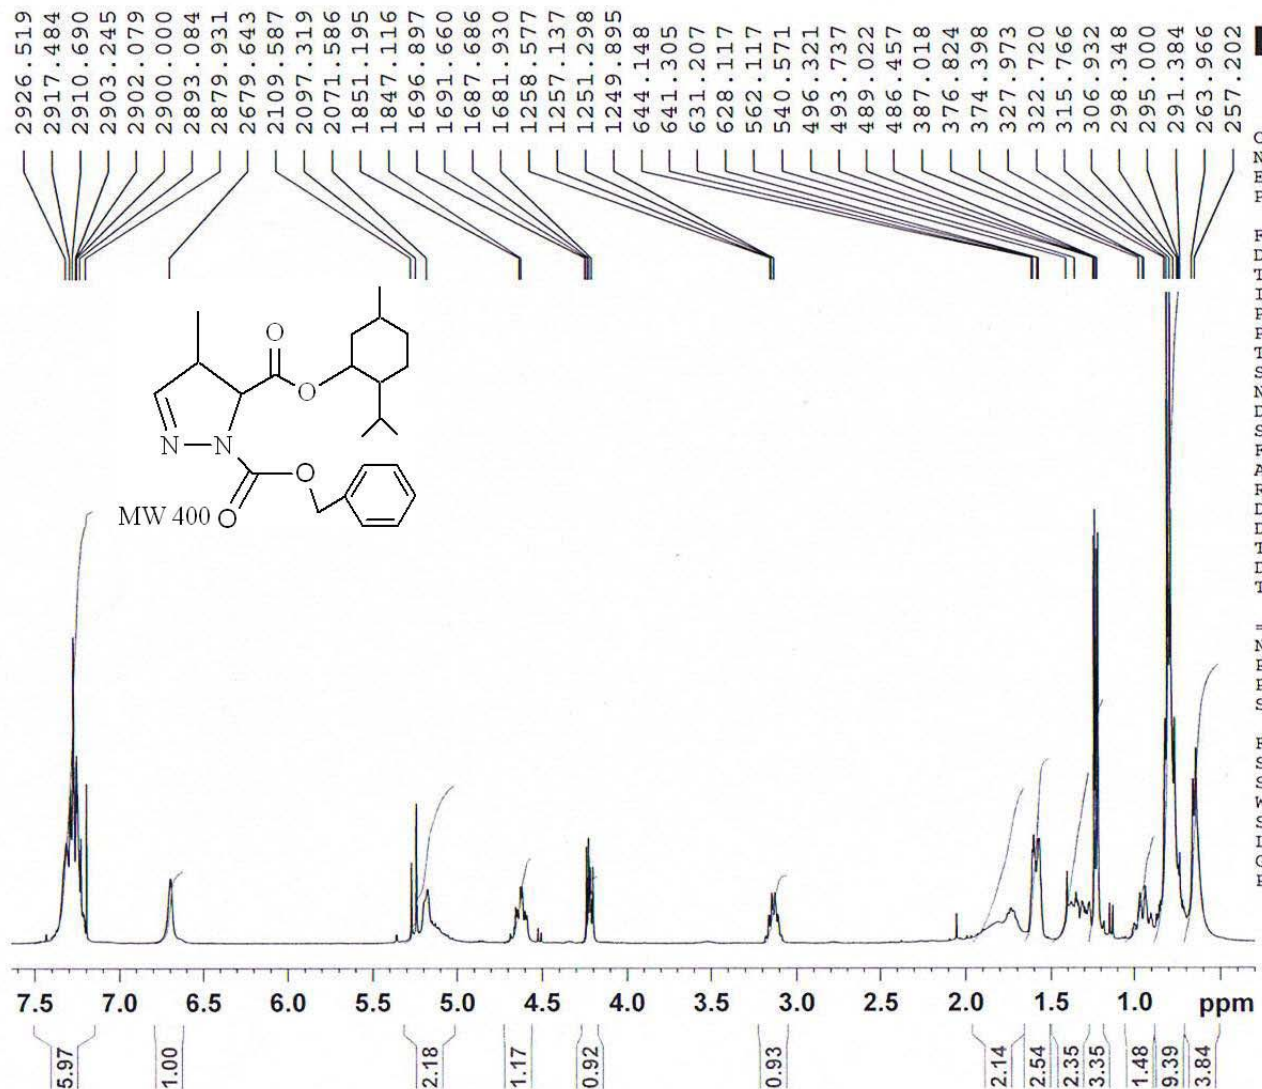

2926.519  
2917.484  
2910.690  
2903.245  
2902.079  
2900.000  
2893.084  
2879.931  
2679.643  
2109.587  
2097.319  
2071.586  
1851.195  
1847.116  
1696.897  
1691.660  
1687.686  
1681.930  
1258.577  
1257.137  
1251.298  
1249.895  
644.148  
641.305  
631.207  
628.117  
562.117  
540.571  
496.321  
493.737  
489.022  
486.457  
387.018  
376.824  
374.398  
327.973  
322.720  
315.766  
306.932  
298.348  
295.000  
291.384  
263.966  
257.202

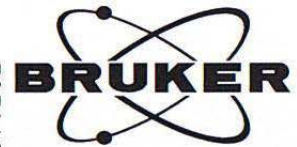

Current Data Parameters  
NAME 400-May01-2006  
EXPNO 10  
PROCNO 1

F2 - Acquisition Parameters  
Date\_ 20060501  
Time 13.52  
INSTRUM spect  
PROBHD 5 mm QNP 1H/13  
PULPROG zg30  
TD 65536  
SOLVENT CDCl3  
NS 8  
DS 2  
SWH 8278.146 Hz  
FIDRES 0.126314 Hz  
AQ 3.9584243 sec  
RG 71.8  
DW 60.400 usec  
DE 6.00 usec  
TE 296.2 K  
D1 1.00000000 sec  
TDO 1

==== CHANNEL f1 =====  
NUC1 1H  
P1 12.25 usec  
PL1 0.00 dB  
SFO1 400.1324710 MHz

F2 - Processing parameters  
SI 32768  
SF 400.1300346 MHz  
WDW EM  
SSB 0  
LB 0.30 Hz  
GB 0  
PC 1.00

Table 1, Cmpd. 11c

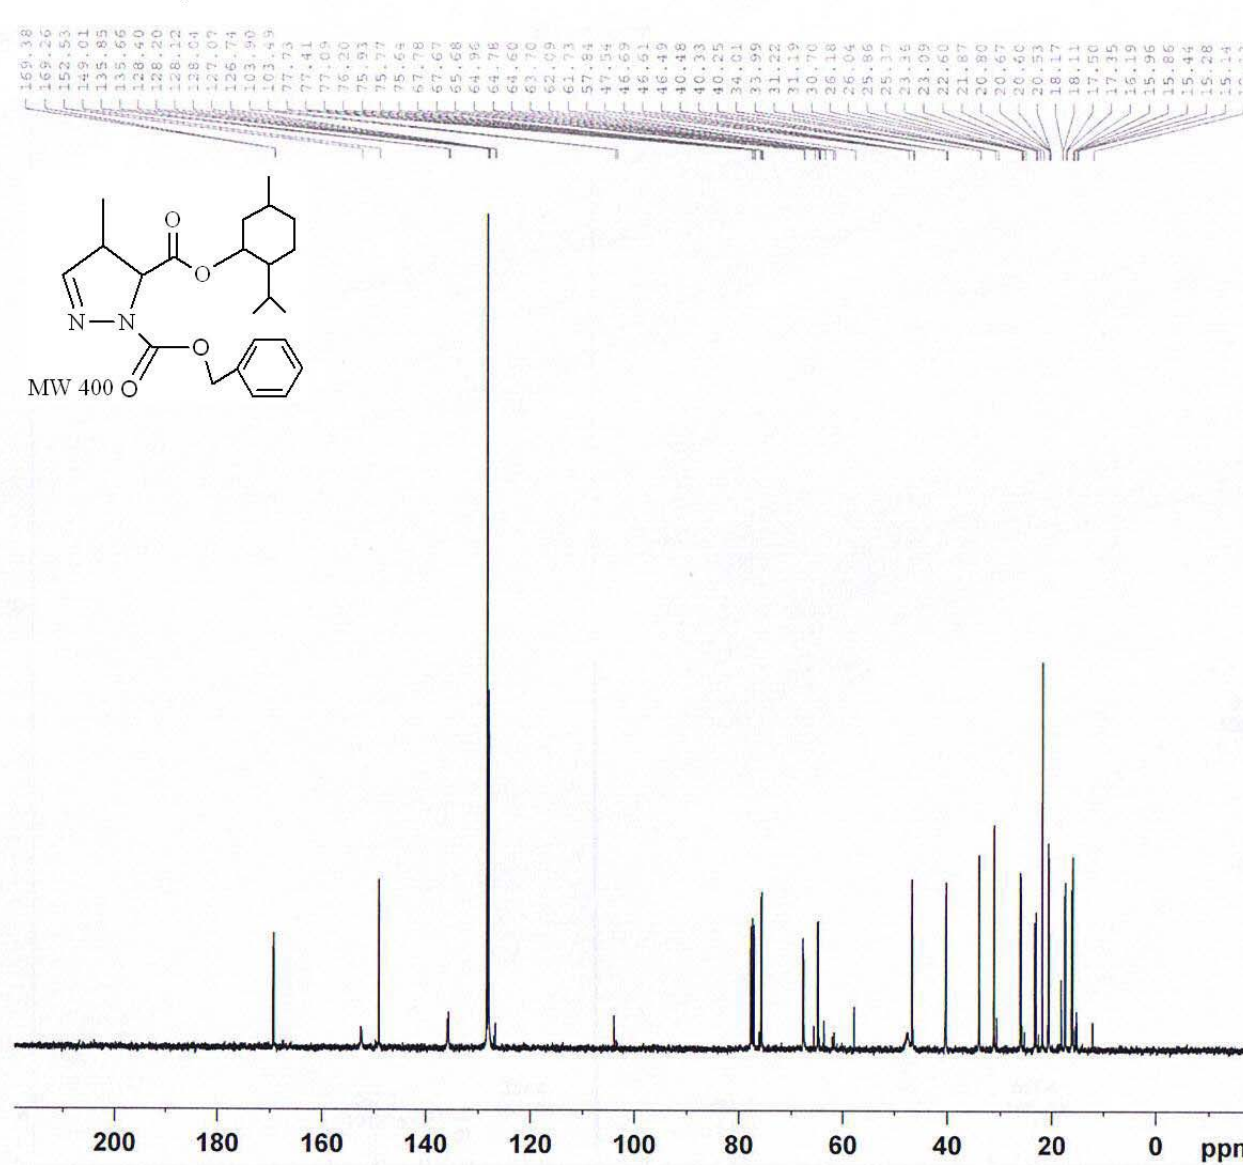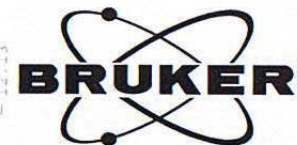

Current Data Parameters  
 NAME 400-Sept15-2005-Rein  
 EXPNO 61  
 PROCNO 1

F2 - Acquisition Parameters  
 Date\_ 20050915  
 Time 14.35  
 INSTRUM spect  
 PROBHD 5 mm QNP 1H/13  
 PULPROG zgpg30  
 TD 65536  
 SOLVENT CDCl3  
 NS 128  
 DS 4  
 SWH 23980.814 Hz  
 FIDRES 0.365918 Hz  
 AQ 1.3664756 sec  
 RG 4096  
 DW 20.850 usec  
 DE 6.00 usec  
 TE 300.2 K  
 D1 2.00000000 sec  
 d11 0.03000000 sec  
 DELTA 1.89999998 sec  
 TD0 1

==== CHANNEL f1 =====  
 NUC1 13C  
 P1 12.50 usec  
 PL1 0.00 dB  
 SFO1 100.6228298 MHz

==== CHANNEL f2 =====  
 CPDPRG2 waltz16  
 NUC2 1H  
 PCPD2 80.00 usec  
 PL2 0.00 dB  
 PL12 16.30 dB  
 PL13 16.30 dB  
 SFO2 400.1316005 MHz

F2 - Processing parameters  
 SI 32768  
 SF 100.6127690 MHz  
 WDW EM  
 SSB 0  
 LB 1.00 Hz  
 GB 0  
 PC 1.40
